# Supplementary material for: Identification of Glycerol 3-phosphate acyltransferase as a potent modifier of α-Synuclein-induced toxicity
Source: Research Square preprint supplement (doi:10.21203/rs.3.rs-4199316/v1), 2024-04-09
Supplement: Supplementary file 1 [file b10320807f5e4fdf22a1c9b3.xlsx]

## Sheet: Description
Supplementary Data 1. Summary of Drosophila genetic screening for a-syn modifiers. RNAi or overexpression lines were crossed to the flies expressing a-syn in the photoreceptor neurons to determine their effect on the percentage of a-syn-induced vacuoles in retina. eGFP RNAi was used as a control. The Anderson-Darling test was applied to assess the nonnormal distribution of data, followed by the M…

## Sheet: Data
_row_sort(optional)	_Loci number(arbitrary)	_Experiment	_Fly Gene	_Human orthologue	_Has been assigned to PD locus?/(multiple)	_Category	_vacuole:0%-100%	_p:0%-100%	_vacuole:10%-90%	_p:10%-90%	_vacuole:15%-85%	_p:15%-85%	_vacuole:20%-80%	_p:20%-80%	_vacuole:25%-75%	_p:25%-75%	25%-75%_p-adj(BH)_2024	25%-75% effect	25%-75% effect	25%-75% effect	25%-75%_Summary	_Effect	5 MWU-test	5 t-test
22	Loci_78	Acbp1.OE	Acbp1	ACBD7			0.30389	1.1737e-06	0.21015	1.5388e-07	0.20812	1.444e-06	0.19034	1.0287e-06	0.21973	7.5316e-05	0.00073246	OE	suppress 2+ fold at	0.01 level	OE suppress 2+ fold at 0.01 level	OE suppress vacuole	significant	significant
102	Loci_35	Amph.OE	Amph	BIN3	1	Vesicular trafficking	2.5073	8.6225e-09	2.3962	3.067e-07	2.3247	3.6123e-06	2.1664	6.4941e-05	2.371	0.00010131	0.00084225	OE	enhance 2+ fold at	0.01 level	OE enhance 2+ fold at 0.01 level	OE enhance vacuole	significant	significant
92	Loci_23	Ank2.RNAi	Ank2	ANK2		Transporter/Channel	1.7216	0.00011464	1.6941	0.0013609	1.7354	0.0013359	1.5422	0.0072999	1.6839	0.008665	0.024399	RNAi		0.05 level
24	Loci_69	ash1.RNAi	ash1	ASH1L		Epigenetic modulation	0.32728	0.00056879	0.36179	0.0094809	0.37834	0.036153	0.2926	0.0032287	0.25008	0.0047035	0.015727	RNAi	suppress 2+ fold at	0.05 level	RNAi suppress 2+ fold at 0.05 level	RNAi suppress vacuole	significant	significant
37	Loci_69	ash1.OE	ash1	ASH1L		Epigenetic modulation	0.47287	0.0059281	0.50962	0.056655	0.48522	0.042461	0.47012	0.033805	0.50709	0.14346	0.23258	OE				OE suppress vacuole(t-test only)	Not significant	significant
74	Loci_38	Atx2.OE	Atx2	ATXN2L		Stress response	1.1256	0.009597	1.1001	0.031046	1.0596	0.073113	0.93016	0.30775	0.91841	0.29315	0.42969	OE
78	Loci_38	Atx2.RNAi	Atx2	ATXN2L		Stress response	1.2486	0.011153	1.2266	0.016782	1.1526	0.014608	1.0428	0.098472	1.1197	0.076181	0.13816	RNAi
81	Loci_77	aux.OE	aux	GAK	1/2	Vesicular trafficking	1.3655	0.91713	1.2404	0.61229	1.2449	0.65771	1.2226	0.59629	1.2125	0.44515	0.57273	OE
93	Loci_77	aux.RNAi	aux	GAK	1/2	Vesicular trafficking	1.772	7.8153e-06	1.923	1.212e-05	1.871	5.5883e-05	1.6369	0.00058275	1.8515	0.0010335	0.0044234	RNAi		0.01 level
14	Loci_64	Bap170.OE	Bap170	ARID2		Transcription regulation	0.21289	5.7441e-09	0.23265	8.6314e-07	0.227	2.8989e-06	0.21191	3.4545e-06	0.25972	0.00027128	0.001699	OE	suppress 2+ fold at	0.01 level	OE suppress 2+ fold at 0.01 level	OE suppress vacuole	significant	significant
86	Loci_64	Bap170.RNAi	Bap170	ARID2		Transcription regulation	1.5331	0.015683	1.5761	0.035826	1.7471	0.0064105	1.3921	0.086223	1.6173	0.051503	0.098408	RNAi
34	Loci_54	bnl.OE	bnl	FGF20	1	Secreted signaling proteins	0.45465	0.00056388	0.45945	0.0020548	0.42291	0.0012217	0.32713	0.00019605	0.31262	0.001494	0.0057092	OE	suppress 2+ fold at	0.01 level	OE suppress 2+ fold at 0.01 level	OE suppress vacuole	significant	significant
51	Loci_11/55	Cdc27.RNAi	Cdc27	cdc27		Ubiquitine-related	0.67124	0.63136	0.73084	1	0.68181	0.84033	0.5829	0.5803	0.60423	0.97906	0.99836	RNAi
109	Loci_18	CG10082.RNAi	CG10082	IP6K2	1	Inositol metabolism	4.8242	4.233e-10	5.0801	3.457e-08	4.8942	4.3263e-07	4.2021	8.5979e-06	4.03	0.00011487	0.00087794	RNAi	enhance 2+ fold at	0.01 level	RNAi enhance 2+ fold at 0.01 level	RNAi enhance vacuole	significant	significant
38	Loci_74	CG11360.RNAi	CG11360	MEX3C	1	Translational regulation	0.48466	0.003715	0.5274	0.047577	0.5574	0.10073	0.52601	0.049857	0.61873	0.14891	0.23431	RNAi
89	Loci_39	CG12104.RNAi	CG12104	TOX3		Transcription regulation	1.6188	0.0010441	1.7213	0.00096048	1.7559	0.0029743	1.5316	0.034102	1.7315	0.037921	0.082807	RNAi
27	Loci_22	CG13397.RNAi	CG13397	naglu		Proteoglycan metabolism	0.37184	0.0075425	0.37727	0.026389	0.38804	0.082598	0.3511	0.021806	0.37467	0.087962	0.15181	RNAi	suppress 2+ fold at			RNAi suppress vacuole(t-test only)	Not significant	significant
61	Loci_22	CG13397.OE	CG13397	naglu		Proteoglycan metabolism	0.80362	0.94549	0.81174	0.83994	0.76583	0.98977	0.67006	0.53304	0.76676	0.78315	0.88207	OE
90	Loci_36	CG15221.RNAi	CG15221	SV2C	1-	Neurotransmitter synthesis/release	1.6398	0.0051946	1.6433	0.01714	1.6008	0.055497	1.3585	0.25911	1.6908	0.04577	0.093344	RNAi
95	Loci_64	CG2926.RNAi	CG2926	SCAF11	1	mRNA processing	1.8378	0.02508	1.8728	0.018948	1.8844	0.016594	1.4895	0.13479	1.5993	0.085228	0.1495	RNAi
67	Loci_05	CG3156.RNAi	CG3156	ABCB9		Transporter/Channel	0.86483	0.64779	0.91904	0.61797	0.98577	0.31084	1.0973	0.34569	1.0909	0.47941	0.58962	RNAi
97	Loci_02	CG32549.RNAi	CG32549	NT5C2		Nucleotide metabolism	2.0131	1.3639e-05	2.3265	1.0099e-05	2.5371	1.189e-05	2.5683	7.1144e-06	2.6661	3.617e-05	0.00048417	RNAi	enhance 2+ fold at	0.01 level	RNAi enhance 2+ fold at 0.01 level	RNAi enhance vacuole	significant	significant
113	Loci_25	CG34194.RNAi	CG34194	SPTSSB	1	Lipid metabolism	10.2264	6.9491e-14	10.5709	3.2581e-11	10.6186	2.5603e-10	8.3536	1.1045e-08	8.7657	1.3186e-07	7.062e-06	RNAi	enhance 2+ fold at	0.01 level	RNAi enhance 2+ fold at 0.01 level	RNAi enhance vacuole	significant	significant
82	Loci_52	CG4078.RNAi	CG4078	BRIP1		DNA damage repair/response	1.4019	0.076121	1.5898	0.027082	1.7034	0.0070183	1.5387	0.046491	1.6349	0.027912	0.063544	RNAi
87	Loci_30	CG44422.RNAi	CG44422	KCNIP3	1	Transporter/Channel	1.592	0.0031113	1.6867	0.0072043	1.7172	0.0054657	1.4755	0.071309	1.5587	0.049329	0.095967	RNAi
48	Loci_34/76	CG4849.RNAi	CG4849	EFTUD2		mRNA processing	0.63808	0.37486	0.50065	0.258	0.51327	0.56973	0.44085	0.17073	0.48664	0.44962	0.57273	RNAi	suppress 2+ fold at
16	Loci_41	CG5214.OE	CG5214	DLST		Energy metabolism	0.22422	1.3879e-08	0.19401	7.4984e-08	0.20535	1.1901e-06	0.19822	2.2082e-06	0.24972	0.00029448	0.001699	OE	suppress 2+ fold at	0.01 level	OE suppress 2+ fold at 0.01 level	OE suppress vacuole	significant	significant
35	Loci_41	CG5214.RNAi	CG5214	DLST		Energy metabolism	0.45673	0.00077621	0.489	0.0036195	0.56722	0.028834	0.53175	0.02056	0.45941	0.046236	0.093344	RNAi	suppress 2+ fold at			RNAi suppress vacuole	significant	Not significant
83	Loci_67	CG5235.RNAi	CG5235	MOXD1		Dopamine metabolism	1.4847	0.53486	1.5806	0.44537	1.5887	0.45693	1.371	0.93941	1.2432	0.77277	0.87964	RNAi
47	Loci_15	CG5254.RNAi	CG5254	SLC25A21		Transporter/Channel	0.62656	0.085812	0.6185	0.17758	0.70279	0.5559	0.647	0.25421	0.72547	0.5636	0.67759	RNAi
110	Loci_14	CG6227.RNAi	CG6227	DDX46		mRNA processing	5.4697	3.4555e-11	5.2511	8.3984e-09	5.0924	2.8652e-07	4.2892	4.5907e-06	4.7178	3.1112e-05	0.00048417	RNAi	enhance 2+ fold at	0.01 level	RNAi enhance 2+ fold at 0.01 level	RNAi enhance vacuole	significant	significant
45	Loci_25	CG7115.RNAi	CG7115	PPM1L		Stress response	0.59247	0.43304	0.59662	0.52068	0.63081	0.87045	0.52807	0.28163	0.49456	0.35336	0.49103	RNAi	suppress 2+ fold at
54	Loci_41	CG7156.RNAi	CG7156	RPS6KL1	1		0.70846	0.7968	0.79107	0.6852	0.65328	0.77317	0.588	0.70072	0.64122	0.98903	0.99836	RNAi
5	Loci_20	CG7461.OE	CG7461	ACADVL		Energy metabolism	0.17131	5.5212e-10	0.17625	6.8509e-08	0.17251	4.6061e-07	0.14957	2.8813e-07	0.1875	4.3056e-05	0.00051241	OE	suppress 2+ fold at	0.01 level	OE suppress 2+ fold at 0.01 level	OE suppress vacuole	significant	significant
44	Loci_20	CG7461.RNAi	CG7461	ACADVL		Energy metabolism	0.58471	0.070104	0.62869	0.20176	0.64897	0.33229	0.47914	0.086223	0.57964	0.37241	0.51087	RNAi
25	Loci_50	CG9231.RNAi	CG9231	FAM162A		Stress response	0.3295	0.00048199	0.37189	0.0093902	0.39118	0.033707	0.34644	0.0092905	0.41959	0.07425	0.13698	RNAi	suppress 2+ fold at			RNAi suppress vacuole(t-test only)	Not significant	significant
105	Loci_02	Chi.OE	Chi	LDB1		Transcription regulation	3.2296	6.4152e-11	3.2512	5.7391e-09	3.2321	7.2224e-08	3.0284	3.2214e-07	3.2936	6.9933e-06	0.00017548	OE	enhance 2+ fold at	0.01 level	OE enhance 2+ fold at 0.01 level	OE enhance vacuole	significant	significant
91	Loci_56	ClC-c.RNAi	ClC-c	CLCN3	1	Transporter/Channel	1.6469	0.11875	1.2103	0.2517	1.1465	0.26808	1.0493	0.71806	1.2368	0.39888	0.5335	RNAi
66	Loci_11/55	comt.RNAi	comt	NSF		Vesicular trafficking	0.86311	0.29692	0.83938	0.35626	0.85373	0.25056	0.70914	0.89054	0.83225	0.32097	0.45792	RNAi
106	Loci_43	Ctl1.RNAi	Ctl1	SLC44A1	1-	Transporter/Channel	3.2567	6.7064e-05	3.5571	0.00017023	3.3386	0.0014005	2.2909	0.02797	2.8768	0.011883	0.030273	RNAi	enhance 2+ fold at	0.05 level	RNAi enhance 2+ fold at 0.05 level	RNAi enhance vacuole	significant	Not significant
43	Loci_59	CYLD.OE	CYLD	CYLD		Ubiquitine-related	0.56951	0.020293	0.59597	0.066769	0.56539	0.048419	0.53941	0.030144	0.44122	0.023499	0.054661	OE	suppress 2+ fold at			OE suppress vacuole(t-test only)	Not significant	significant
76	Loci_29	dbo.RNAi	dbo	KLHL7		Ubiquitine-related	1.1769	0.19318	1.2349	0.12441	1.2812	0.069148	1.0594	0.31955	1.3124	0.12034	0.1981	RNAi
59	Loci_61	Dhc93AB.RNAi	Dhc93AB	DNAH17	1	Vesicular trafficking	0.77049	0.77207	0.85259	0.87016	0.58459	0.96807	0.51158	0.44794	0.5913	0.90154	0.98433	RNAi
79	Loci_16	dlg1.RNAi	dlg1	DLG2	1	Synapse protein	1.2714	0.44456	1.3922	0.22692	1.235	0.29194	1.1377	0.59467	1.2145	0.38635	0.52328	RNAi
50	Loci_66	dve.OE	dve	SATB1	1	Transcription regulation	0.66297	0.086702	0.66728	0.13235	0.63231	0.111	0.60189	0.067783	0.67203	0.14717	0.23431	OE
55	Loci_66	dve.RNAi	dve	SATB1	1	Transcription regulation	0.726	0.25166	0.85062	0.97113	0.94811	0.54052	0.87544	0.95454	0.9216	0.92319	0.98516	RNAi
65	Loci_40	Eip93F.OE	Eip93F	LCORL	1	Transcription regulation	0.83292	0.61079	0.78883	0.28777	0.72985	0.19998	0.6565	0.14885	0.68516	0.25296	0.38122	OE
108	Loci_40	Eip93F.RNAi	Eip93F	LCORL	1	Transcription regulation	4.4672	4.7369e-10	4.9607	9.4983e-09	5.2714	1.0131e-07	4.7436	1.331e-06	5.6215	8.2015e-06	0.00017548	RNAi	enhance 2+ fold at	0.01 level	RNAi enhance 2+ fold at 0.01 level	RNAi enhance vacuole	significant	significant
15	Loci_63	emp.RNAi	emp	SCARB2	1/3	Vesicular trafficking	0.21719	9.9294e-06	0.23277	0.00028478	0.21256	0.00089164	0.19691	0.00021928	0.22093	0.0031218	0.011134	RNAi	suppress 2+ fold at	0.05 level	RNAi suppress 2+ fold at 0.05 level	RNAi suppress vacuole	significant	significant
20	Loci_03/24	EndoA.RNAi	EndoA	SH3GL2	1	Vesicular trafficking	0.28084	0.00025077	0.31248	0.00036751	0.34984	0.0070215	0.36939	0.0044107	0.41757	0.041088	0.086204	RNAi	suppress 2+ fold at			RNAi suppress vacuole	significant	significant
46	Loci_67	eya.RNAi	eya	EYA4		DNA damage repair/response	0.61585	0.41837	0.63193	0.72403	0.60893	0.78545	0.53986	0.28715	0.57154	0.44962	0.57273	RNAi
13	Loci_26	fray.RNAi	fray	STK39	1	Stress response	0.21277	3.9916e-06	0.24409	0.00040429	0.26292	0.0038481	0.23691	0.00062659	0.30069	0.017401	0.041376	RNAi	suppress 2+ fold at	0.05 level	RNAi suppress 2+ fold at 0.05 level	RNAi suppress vacuole	significant	significant
32	Loci_02	garz.RNAi	garz	GBF1	1	Vesicular trafficking	0.42037	0.026876	0.44133	0.018853	0.47139	0.061227	0.53533	0.08926	0.48176	0.099097	0.16568	RNAi	suppress 2+ fold at			RNAi suppress vacuole(t-test only)	Not significant	significant
62	Loci_69	Gba1a.RNAi	Gba1a	Gba	1	Lipid metabolism	0.80391	0.86491	0.79269	0.87016	0.79303	0.71863	0.57913	0.50906	0.58455	0.65009	0.76439	RNAi
68	Loci_69	Gba1b.RNAi	Gba1b	Gba	1	Lipid metabolism	0.92733	0.26781	0.92121	0.31085	0.84175	0.40956	0.66992	0.88248	0.80484	0.65009	0.76439	RNAi
18	Loci_49	Ggamma1.RNAi	Ggamma1	GNG7		GTPase	0.24187	2.4611e-05	0.23172	0.00018441	0.21221	0.00061452	0.16829	6.5906e-05	0.18301	0.0013624	0.0053991	RNAi	suppress 2+ fold at	0.01 level	RNAi suppress 2+ fold at 0.01 level	RNAi suppress vacuole	significant	significant
88	Loci_05	Hip1.RNAi	Hip1	HIP1R	1	Vesicular trafficking	1.6137	0.014071	1.8427	0.0043841	2.0223	0.003572	1.8461	0.021485	1.8051	0.015735	0.038265	RNAi		0.05 level		RNAi enhance vacuole	significant	Not significant
57	Loci_33	Hr3.RNAi	Hr3	RORA		Circadian rhythm	0.75036	0.73021	0.69515	0.88046	0.71793	0.64813	0.63598	0.75998	0.65066	0.92334	0.98516	RNAi
41	Loci_78	if.RNAi	if	ITGA8	1	Cytoskeleton	0.51108	0.073252	0.56025	0.28412	0.5268	0.36352	0.46539	0.10837	0.54565	0.45856	0.57725	RNAi
28	Loci_52	IntS2.RNAi	IntS2	INTS2		Transcription regulation	0.37284	0.0016866	0.36027	0.0084145	0.4118	0.074188	0.33786	0.0090096	0.36002	0.040539	0.086204	RNAi	suppress 2+ fold at			RNAi suppress vacuole(t-test only)	Not significant	significant
84	Loci_32	Irk2.RNAi	Irk2	KCNJ6		Transporter/Channel	1.4937	0.012214	1.3908	0.046131	1.21	0.044473	1.1432	0.071309	1.1585	0.049329	0.095967	RNAi
39	Loci_80	Kap-alpha3.RNAi	Kap-alpha3	KPNA3		Transporter/Channel	0.50209	0.088525	0.50816	0.27313	0.51993	0.57328	0.45014	0.14463	0.50001	0.44347	0.57273	RNAi
56	Loci_13	kto.RNAi	kto	MED12L	1	Transcription regulation	0.73622	0.97952	0.72143	0.81153	0.77075	0.75393	0.81729	1	0.69589	0.72784	0.83741	RNAi
36	Loci_38	Lnk.RNAi	Lnk	SH2B1		Energy metabolism	0.46911	0.066529	0.48083	0.15429	0.51633	0.45693	0.47703	0.20295	0.51459	0.47848	0.58962	RNAi
21	Loci_65	loco.RNAi	loco	RGS10		GTPase	0.29093	2.0816e-05	0.33762	0.001492	0.35945	0.0095743	0.33478	0.0030423	0.38524	0.029751	0.06632	RNAi	suppress 2+ fold at			RNAi suppress vacuole	significant	significant
80	Loci_70	Lrrk.RNAi	Lrrk	LRRK2	1	GTPase	1.3143	0.0040563	1.3471	0.013211	1.3105	0.015269	1.2084	0.059789	1.0932	0.090873	0.15434	RNAi
49	Loci_01	Mccc1.OE	Mccc1	MCCC1	1	Energy metabolism	0.64139	0.047907	0.62165	0.094435	0.62034	0.11028	0.61719	0.10615	0.65349	0.33925	0.47763	OE
103	Loci_01	Mccc1.RNAi	Mccc1	MCCC1	1	Energy metabolism	2.5078	2.4236e-05	2.6855	6.9319e-05	2.8626	0.00014865	3.269	0.00014947	3.0506	0.0013108	0.0053944	RNAi	enhance 2+ fold at	0.01 level	RNAi enhance 2+ fold at 0.01 level	RNAi enhance vacuole	significant	significant
2	Loci_53	mino.RNAi	mino	GPAM		Lipid metabolism	0.13644	3.5254e-08	0.15453	5.8677e-06	0.12197	2.1238e-05	0.11536	6.674e-06	0.13663	0.00033345	0.001699	RNAi	suppress 2+ fold at	0.01 level	RNAi suppress 2+ fold at 0.01 level	RNAi suppress vacuole	significant	significant
71	Loci_32	mnb.RNAi	mnb	DYRK1A	1	Stress response	0.99004	0.68238	0.98735	0.73879	0.96646	0.89174	0.83233	0.56093	0.99732	0.98903	0.99836	RNAi
77	Loci_32	mnb.OE	mnb	DYRK1A	1	Stress response	1.2392	0.049328	1.1002	0.23631	0.96013	0.46292	0.79381	0.98108	0.85666	0.83347	0.91939	OE
52	Loci_80	Mo25.RNAi	Mo25	CAB39L	1	Tumor suppressor/oncogene	0.67892	0.48958	0.74589	0.8575	0.78003	0.8276	0.65558	0.39352	0.81921	0.92992	0.98516	RNAi
26	Loci_20	nAChRbeta1.OE	nAChRbeta1	CHRNB1	1	Chemical receptor	0.34904	3.5322e-05	0.31627	0.00022728	0.31241	0.00075	0.28972	0.00037416	0.31211	0.0071748	0.021325	OE	suppress 2+ fold at	0.05 level	OE suppress 2+ fold at 0.05 level	OE suppress vacuole	significant	significant
73	Loci_56	niki.RNAi	niki	NEK1		DNA damage repair/response	1.1014	0.44118	1.0971	0.24193	1.1579	0.14309	1.0727	0.31729	1.3617	0.054589	0.10247	RNAi
6	Loci_58	nonC.RNAi	nonC	SMG1		mRNA processing	0.17623	1.8203e-07	0.2023	2.0352e-05	0.23158	0.00054792	0.21461	0.00021086	0.19807	0.0019508	0.0071978	RNAi	suppress 2+ fold at	0.01 level	RNAi suppress 2+ fold at 0.01 level	RNAi suppress vacuole	significant	significant
99	Loci_22	Nrx-IV.RNAi	Nrx-IV	CNTNAP1			2.3233	0.00012274	1.7621	0.0030408	1.6129	0.013731	1.4718	0.062564	1.8161	0.010889	0.029393	RNAi		0.05 level
96	Loci_11/55	nsl1.RNAi	nsl1	KANSL1		Epigenetic modulation	1.9528	1.1375e-05	2.0828	2.8562e-05	2.2758	1.8898e-05	2.0823	0.00012375	2.5152	0.00010233	0.00084225	RNAi	enhance 2+ fold at	0.01 level	RNAi enhance 2+ fold at 0.01 level	RNAi enhance vacuole	significant	significant
30	Loci_53	Pdcd4.RNAi	Pdcd4	PDCD4		Translational regulation	0.40475	0.026362	0.41037	0.080858	0.4089	0.19739	0.34727	0.025278	0.33707	0.080846	0.14418	RNAi	suppress 2+ fold at			RNAi suppress vacuole(t-test only)	Not significant	significant
75	Loci_10	Pgam5.RNAi	Pgam5	PGAM5		Stress response	1.1341	0.14719	1.2565	0.074837	1.3275	0.036647	1.2072	0.24526	0.94344	0.2011	0.3074	RNAi
58	Loci_54	Pop2.RNAi	Pop2	CNOT7		mRNA processing	0.76025	0.88665	0.82103	0.78864	0.65748	0.99361	0.54177	0.32923	0.61108	0.69015	0.80267	RNAi
29	Loci_45	Psn.OE	Psn	PSEN2		Peptide cleavage	0.37817	2.3677e-05	0.36174	6.9293e-05	0.37395	0.00038517	0.32601	0.00011198	0.34102	0.00076248	0.0033994	OE	suppress 2+ fold at	0.01 level	OE suppress 2+ fold at 0.01 level	OE suppress vacuole	significant	significant
31	Loci_02	Ptx1.OE	Ptx1	PITX3		Transcription regulation	0.41261	1.5606e-05	0.4255	0.00073732	0.39158	0.00074817	0.39912	0.0011368	0.41956	0.003426	0.011825	OE	suppress 2+ fold at	0.05 level	OE suppress 2+ fold at 0.05 level	OE suppress vacuole	significant	significant
60	Loci_02	Ptx1.RNAi	Ptx1	PITX3		Transcription regulation	0.80067	0.93997	0.93751	0.53186	0.99598	0.32768	1.1085	0.25509	1.1649	0.18902	0.29312	RNAi
33	Loci_07	Pu.OE	Pu	GCH1	1	Dopamine metabolism	0.43389	0.00021907	0.45266	0.0023506	0.42309	0.0028253	0.33437	0.00019483	0.22434	0.00037568	0.0018272	OE	suppress 2+ fold at	0.01 level	OE suppress 2+ fold at 0.01 level	OE suppress vacuole	significant	significant
70	Loci_05	Rilpl.RNAi	Rilpl	RILPL2		Cytoskeleton	0.98574	0.40749	1.1505	0.28249	1.0548	0.2713	1.1923	0.22893	1.1886	0.27902	0.41465	RNAi
94	Loci_19	Rim.RNAi	Rim	RIMS1	1	Vesicular trafficking	1.8295	0.00035793	1.8548	0.00084633	1.9502	0.0015692	1.7165	0.015824	1.7628	0.011565	0.030182	RNAi		0.05 level
3	Loci_20	RpII215.RNAi	RpII215	POLR2A		Transcription regulation	0.16566	2.423e-07	0.18044	1.7416e-05	0.19795	0.00030515	0.18623	0.00010746	0.16112	0.00045602	0.0021215	RNAi	suppress 2+ fold at	0.01 level	RNAi suppress 2+ fold at 0.01 level	RNAi suppress vacuole	significant	significant
7	Loci_60	SdhC.OE	SdhC	SDHC		Energy metabolism	0.18301	1.5193e-09	0.20205	4.6215e-07	0.1917	1.1155e-06	0.17824	1.7601e-06	0.22516	0.00031951	0.001699	OE	suppress 2+ fold at	0.01 level	OE suppress 2+ fold at 0.01 level	OE suppress vacuole	significant	significant
64	Loci_60	SdhC.RNAi	SdhC	SDHC		Energy metabolism	0.8244	0.97847	0.86528	0.87869	0.68851	0.91361	0.63622	0.51822	0.76457	1	1	RNAi
111	Loci_06	Set1.RNAi	Set1	SETD1A	1	Epigenetic modulation	6.4396	2.295e-13	6.7104	6.801e-11	6.7567	1.0195e-09	5.6374	1.4888e-08	5.6555	5.3381e-07	1.9046e-05	RNAi	enhance 2+ fold at	0.01 level	RNAi enhance 2+ fold at 0.01 level	RNAi enhance vacuole	significant	significant
40	Loci_68	Shab.RNAi	Shab	KCNS3	1	Transporter/Channel	0.5101	0.0020339	0.38971	0.0022696	0.38359	0.0067053	0.35548	0.0028652	0.40858	0.012418	0.030901	RNAi	suppress 2+ fold at	0.05 level	RNAi suppress 2+ fold at 0.05 level	RNAi suppress vacuole	significant	significant
17	Loci_62	shep.RNAi	shep	RBMS3		mRNA processing	0.22574	4.1724e-06	0.24518	0.00023225	0.26829	0.0026786	0.2348	0.00032172	0.28962	0.0086504	0.024399	RNAi	suppress 2+ fold at	0.05 level	RNAi suppress 2+ fold at 0.05 level	RNAi suppress vacuole	significant	significant
100	Loci_09	shi.RNAi	shi	DNM3		Vesicular trafficking	2.4273	7.0049e-06	2.7456	2.3118e-06	2.8797	9.725e-06	2.671	4.4508e-05	2.9634	0.0001409	0.0010051	RNAi	enhance 2+ fold at	0.01 level	RNAi enhance 2+ fold at 0.01 level	RNAi enhance vacuole	significant	significant
69	Loci_52	skd.OE	skd	Med13	1	Transcription regulation	0.96934	0.31839	1.1409	0.058815	1.0459	0.19739	0.87978	0.61523	0.92755	0.50058	0.60866	OE
101	Loci_52	skd.RNAi	skd	Med13	1	Transcription regulation	2.4957	2.3679e-06	2.4627	3.9187e-05	2.5141	9.3986e-05	2.0311	0.0017878	1.7535	0.0058903	0.018537	RNAi		0.05 level		RNAi enhance vacuole	significant	Not significant
112	Loci_07	smg.RNAi	smg	SAMD4A		Translational regulation	7.1539	1.2362e-14	8.0128	4.0612e-12	8.2145	6.9876e-11	7.2397	2.2455e-09	7.8773	5.9226e-08	6.3344e-06	RNAi	enhance 2+ fold at	0.01 level	RNAi enhance 2+ fold at 0.01 level	RNAi enhance vacuole	significant	significant
42	Loci_35	sr.RNAi	sr	EGR3		Transcription regulation	0.55213	0.20153	0.59331	0.55849	0.67332	0.68698	0.58954	0.62125	0.64763	0.95813	0.99836	RNAi
9	Loci_83	Src64B.RNAi	Src64B	FYN	1	Tumor suppressor/oncogene	0.20455	3.466e-06	0.19665	4.698e-05	0.14665	5.9684e-05	0.13443	1.6058e-05	0.14017	0.00032284	0.001699	RNAi	suppress 2+ fold at	0.01 level	RNAi suppress 2+ fold at 0.01 level	RNAi suppress vacuole	significant	significant
63	Loci_65	stv.RNAi	stv	BAG3	1/2	Stress response	0.80872	0.61624	0.85653	0.90113	0.89805	0.89174	0.83687	0.80539	0.78646	0.98903	0.99836	RNAi
72	Loci_09	Syb.RNAi	Syb	VAMP4	1	Vesicular trafficking	1.024	0.085812	0.87226	0.22207	0.91737	0.1288	0.80584	0.47023	0.83759	0.31852	0.45792	RNAi
107	Loci_06	Syx1A.RNAi	Syx1A	STX1B		Vesicular trafficking	3.3603	3.8485e-10	3.2204	3.6409e-08	3.4203	2.6691e-07	3.0936	2.9438e-06	3.1147	3.3613e-05	0.00048417	RNAi	enhance 2+ fold at	0.01 level	RNAi enhance 2+ fold at 0.01 level	RNAi enhance vacuole	significant	significant
10	Loci_11/55	tau.RNAi	tau	MAPT	1/3-	Cytoskeleton	0.20467	8.7893e-06	0.23507	0.00085553	0.22552	0.0028229	0.2177	0.0010655	0.24276	0.010988	0.029393	RNAi	suppress 2+ fold at	0.05 level	RNAi suppress 2+ fold at 0.05 level	RNAi suppress vacuole	significant	significant
53	Loci_33	Vps13.OE	Vps13	Vps13C	1		0.70342	0.76342	0.7372	0.91352	0.71361	0.88955	0.62362	0.54265	0.6842	0.83347	0.91939	OE
98	Loci_33	Vps13.RNAi	Vps13	Vps13C	1		2.1456	0.0001574	2.2802	0.00077902	2.4202	0.0007255	2.2681	0.0024375	2.2665	0.0050941	0.016517	RNAi	enhance 2+ fold at	0.05 level	RNAi enhance 2+ fold at 0.05 level	RNAi enhance vacuole	significant	Not significant
11	Loci_11/55	wg.OE	wg	WNT3	1/3	Secreted signaling proteins	0.20533	8.7809e-10	0.20659	1.4174e-07	0.19492	2.469e-07	0.19354	8.713e-07	0.21876	7.4964e-05	0.00073246	OE	suppress 2+ fold at	0.01 level	OE suppress 2+ fold at 0.01 level	OE suppress vacuole	significant	significant
104	Loci_41	ZAP3.RNAi	ZAP3	YLPM1			2.5104	8.7781e-05	2.5231	5.7935e-05	2.8632	2.8223e-05	2.579	9.9091e-05	2.5124	0.0001951	0.0013047	RNAi	enhance 2+ fold at	0.01 level	RNAi enhance 2+ fold at 0.01 level	RNAi enhance vacuole	significant	significant
85	Loci_78	Zip89B.RNAi	Zip89B	SLC39A1		Transporter/Channel	1.5005	0.004656	1.6774	0.001152	1.7191	0.0011472	1.3682	0.020276	1.6021	0.0069123	0.021132	RNAi		0.05 level
