# Supplementary material for: Identification of Glycerol 3-phosphate acyltransferase as a potent modifier of α-Synuclein-induced toxicity
Source: Research Square preprint supplement (doi:10.21203/rs.3.rs-4199316/v1), 2024-04-09
Supplement: Supplementary file 2 [file c259001832f159d80f80c1a0.xlsx]

## Sheet: Fig 1a
Figure 1a	Experiment	vacuole:25%-75%	p-adj(BH)
	mino.RNAi	0.13663	0.0014492
	Src64B.RNAi	0.14017	0.0014492
	RpII215.RNAi	0.16112	0.0018404
	Ggamma1.RNAi	0.18301	0.0046652
	CG7461.OE	0.1875	0.00044275
	nonC.RNAi	0.19807	0.0062983
	wg.OE	0.21876	0.00060778
	Acbp1.OE	0.21973	0.00060778
	emp.RNAi	0.22093	0.009799
	Pu.OE	0.22434	0.0015723
	SdhC.OE	0.22516	0.0014492
	tau.RNAi	0.24276	0.026992
	CG5214.OE	0.24972	0.0014468
	ash1.RNAi	0.25008	0.013987
	Bap170.OE	0.25972	0.0013934
	shep.RNAi	0.28962	0.022253
	fray.RNAi	0.30069	0.038555
	nAChRbeta1.OE	0.31211	0.019304
	bnl.OE	0.31262	0.0049654
	Pdcd4.RNAi	0.33707	0.13842
	Psn.OE	0.34102	0.002971
	IntS2.RNAi	0.36002	0.081455
	CG13397.RNAi	0.37467	0.14617
	loco.RNAi	0.38524	0.062257
	Shab.RNAi	0.40858	0.028637
	EndoA.RNAi	0.41757	0.081455
	Ptx1.OE	0.41956	0.010463
	CG9231.RNAi	0.41959	0.1311
	CYLD.OE	0.44122	0.051065
	CG5214.RNAi	0.45941	0.088554
	garz.RNAi	0.48176	0.15997
	CG4849.RNAi	0.48664	0.56452
	CG7115.RNAi	0.49456	0.48108
	Kap-alpha3.RNAi	0.50001	0.56452
	ash1.OE	0.50709	0.22515
	Lnk.RNAi	0.51459	0.58251
	if.RNAi	0.54565	0.56942
	eya.RNAi	0.57154	0.56452
	CG7461.RNAi	0.57964	0.50098
	Gba1a.RNAi	0.58455	0.75732
	Dhc93AB.RNAi	0.5913	0.97956
	Cdc27.RNAi	0.60423	0.99786
	Pop2.RNAi	0.61108	0.79579
	CG11360.RNAi	0.61873	0.22739
	CG7156.RNAi	0.64122	0.99786
	sr.RNAi	0.64763	0.99786
	Hr3.RNAi	0.65066	0.98207
	Mccc1.OE	0.65349	0.4675
	dve.OE	0.67203	0.22739
	Vps13.OE	0.6842	0.91439
	Eip93F.OE	0.68516	0.37123
	kto.RNAi	0.69589	0.83077
	CG5254.RNAi	0.72547	0.67039
	SdhC.RNAi	0.76457	1
	CG13397.OE	0.76676	0.8762
	stv.RNAi	0.78646	0.99786
	Gba1b.RNAi	0.80484	0.75732
	Mo25.RNAi	0.81921	0.98207
	comt.RNAi	0.83225	0.44777
	Syb.RNAi	0.83759	0.44777
	mnb.OE	0.85666	0.91439
	Atx2.OE	0.91841	0.41932
	dve.RNAi	0.9216	0.98207
	skd.OE	0.92755	0.60176
	Pgam5.RNAi	0.94344	0.299
	mnb.RNAi	0.99732	0.99786
	CG3156.RNAi	1.0909	0.58251
	Lrrk.RNAi	1.0932	0.14882
	Atx2.RNAi	1.1197	0.13244
	Irk2.RNAi	1.1585	0.09138
	Ptx1.RNAi	1.1649	0.28479
	Rilpl.RNAi	1.1886	0.40422
	aux.OE	1.2125	0.56452
	dlg1.RNAi	1.2145	0.51362
	ClC-c.RNAi	1.2368	0.52411
	CG5235.RNAi	1.2432	0.87323
	dbo.RNAi	1.3124	0.19153
	niki.RNAi	1.3617	0.097914
	CG44422.RNAi	1.5587	0.09138
	CG2926.RNAi	1.5993	0.14374
	Zip89B.RNAi	1.6021	0.019051
	Bap170.RNAi	1.6173	0.093868
	CG4078.RNAi	1.6349	0.05951
	Ank2.RNAi	1.6839	0.022253
	CG15221.RNAi	1.6908	0.088554
	CG12104.RNAi	1.7315	0.07791
	skd.RNAi	1.7535	0.01664
	Rim.RNAi	1.7628	0.027805
	Hip1.RNAi	1.8051	0.035561
	Nrx-IV.RNAi	1.8161	0.026992
	aux.RNAi	1.8515	0.0037673
	Vps13.RNAi	2.2665	0.01476
	Amph.OE	2.371	0.00072271
	ZAP3.RNAi	2.5124	0.0011023
	nsl1.RNAi	2.5152	0.00072271
	CG32549.RNAi	2.6661	0.00040906
	Ctl1.RNAi	2.8768	0.027975
	shi.RNAi	2.9634	0.00088454
	Mccc1.RNAi	3.0506	0.0046288
	Syx1A.RNAi	3.1147	0.00040906
	Chi.OE	3.2936	0.00015443
	CG10082.RNAi	4.03	0.00076355
	CG6227.RNAi	4.7178	0.00040906
	Eip93F.RNAi	5.6215	0.00015443
	Set1.RNAi	5.6555	2.0114e-05
	smg.RNAi	7.8773	6.6896e-06
	CG34194.RNAi	8.7657	7.458e-06

## Sheet: Fig 1b
Figure 1b	day	eGFP RNAi	eGFP RNAi	eGFP RNAi	eGFP RNAi	eGFP RNAi	eGFP RNAi	eGFP RNAi	eGFP RNAi	eGFP RNAi	eGFP RNAi	eGFP RNAi	eGFP RNAi	eGFP RNAi	eGFP RNAi	eGFP RNAi	eGFP RNAi	eGFP RNAi	eGFP RNAi	eGFP RNAi	eGFP RNAi	eGFP RNAi	eGFP RNAi	eGFP RNAi	eGFP RNAi	eGFP RNAi	α-syn, eGFP RNAi	α-syn, eGFP RNAi	α-syn, eGFP RNAi	α-syn, eGFP RNAi	α-syn, eGFP RNAi	α-syn, eGFP RNAi	α-syn, eGFP RNAi	α-syn, eGFP RNAi	α-syn, eGFP RNAi	α-syn, eGFP RNAi	α-syn, eGFP RNAi	α-syn, eGFP RNAi	α-syn, eGFP RNAi	α-syn, eGFP RNAi	α-syn, eGFP RNAi	α-syn, eGFP RNAi	α-syn, eGFP RNAi	α-syn, eGFP RNAi	α-syn, eGFP RNAi	α-syn, eGFP RNAi	α-syn, eGFP RNAi	α-syn, eGFP RNAi	α-syn, eGFP RNAi
	7	10.5761	10.138	9.2039	9.2612	9.1183	9.0288	9.0221	9.0437	8.8422	8.7012	8.5548	8.47	8.2813													6.7908	7.397	7.2076	7.2829	7.2644	7.1557	7.2107	7.2651	7.3489	7.261	7.1251	7.069	7.0208
	14	7.7959	8.0575	8.1347	8.4716	8.6576	8.5662	8.4917	8.6803	8.6908	8.7428	8.7388	8.8413	8.7915	8.7845												6.0607	6.4676	6.5556	6.598	6.4757	6.6745	6.7589	6.8138	6.8291	6.7912	6.8073	6.7747	6.835	6.8087
	21	7.7131	8.713	8.7451	8.7646	8.7137	8.5928	8.5213	8.5652	8.5659	8.643	8.631	8.6549														4.727	4.7612	4.8296	5.1196	5.1588	4.9777	5.0177	4.9586	4.8785	5.0036	5.0628	4.9182
	28	7.6365	7.0376	7.0461	7.0157	7.0018	6.7862	6.6188	6.9417	7.0357	7.1301	7.206	7.2302	7.3037	7.3291												4.1369	4.5779	4.6555	4.8631	5.0461	4.7995	4.8247	4.8769	4.8237	4.7363	4.6848	4.674	4.6729	4.6239
	35	7.1515	6.9835	6.6637	6.7618	6.8299	6.9019	6.917	6.917	6.913	6.8112	6.7795	6.8629	6.8794	6.8263	6.8485	6.9107	6.9419	6.9611	6.925	6.9432						2.9426	2.8603	2.9885	3.212	3.443	3.5352	3.4634	3.4922	3.4579	3.5149	3.5118	3.4888	3.4848	3.4493	3.4842	3.4877	3.5942	3.6122	3.6158	3.6219
	42	3.0733	3.4035	3.8766	3.8293	3.8695	3.9796	3.8845	3.9963	4.0282	4.0335	3.9995	4.122	4.115	4.0946	4.0928	4.1258	4.1706	4.1888	4.1917	4.2148	4.1692	4.1684	4.1889	4.1772	4.214	1.7741	1.7747	2.0244	2.0438	1.9712	2.1079	2.072	2.1126	2.1176	2.1706	2.221	2.1683	2.1781	2.1671	2.1618	2.1819	2.2009	2.1892	2.1898	2.1771	2.1784	2.1677	2.1846
	49	1.5254	1.6464	1.7681	1.8438	1.8201	1.8769	1.8209	1.7928	1.7687	1.7469	1.7253	1.7396	1.81	1.8665	1.9271	1.9606	1.9811	1.9995	2.0154	2.0668	2.1091	2.1502	2.1819			2.038	1.6816	1.6409	1.8502	1.8664	1.8409	1.8235	1.8188	1.8478	1.9126	1.8865	1.8941	1.8457	1.9798	1.959	1.9527	2.064	2.0313	1.9878	2.0155	2.0384	2.0215	2.0421
	56	1.5211	1.5953	1.621	1.6989	1.6658	1.688	1.7006	1.6868	1.9096	2.1162	2.0538	2.0154	1.9903	2.0182	1.9891											1.1377	1.0526	1.3296	1.2869	1.488	1.4201	1.5153	1.5201	1.4967	1.4384	1.4077	1.4483	1.4335	1.4126	1.3882
[truncated: 52 more columns]

## Sheet: Fig 1c
Figure 1c	day	No α-syn	No α-syn	No α-syn	No α-syn	No α-syn	No α-syn	No α-syn	No α-syn	No α-syn	No α-syn	No α-syn	No α-syn	No α-syn	No α-syn	No α-syn	No α-syn	No α-syn	No α-syn	No α-syn	No α-syn	mino RNAi	mino RNAi	mino RNAi	mino RNAi	mino RNAi	mino RNAi	mino RNAi	mino RNAi	mino RNAi	mino RNAi	mino RNAi	mino RNAi	mino RNAi	mino RNAi	mino RNAi	mino RNAi	mino RNAi	mino RNAi	mino RNAi	mino RNAi	mino overexpression	mino overexpression	mino overexpression	mino overexpression	mino overexpression	mino overexpression	mino overexpression	mino overexpression
	2	8.8806	9.6721	8.8797	10.2995	8.2736	8.5747	9.9611	10.5339	10.3469	8.9487	8.8488	8.4316									9.4778	9.1095	9.4521	7.9767	8.9694	9.521	9.8158	9.219	10.4537	9.2725	10.2617	10.3342									8.2871	9.343	9.8373	10.219	10.1378	9.9245	11.0304	10.4786
	4	8.6487	8.7574	8.5504	8.3606	8.9669	9.2166	9.8384	9.1674	9.2571	9.6355	8.1976	12.4172	10.4562	10.6048	10.1181	10.566	9.9203	10.5772	10.8133	9.6186	7.1332	8.8136	8.9618	8.4139	8.9395	9.0644	8.5081	9.9897	8.4837	8.6659	9.7391	9.4092	9.2815	9.4053	9.8966	8.9723	9.9661	9.8021	8.555	8.6091	6.9765	8.2562	8.9963	7.5451	8.6928	9.1834	8.5939	8.5586
	6	7.9578	8.5089	7.828	9.5629	9.0557	9.6531	8.9199	8.1826	10.1582	8.6762	8.8758	10.2634	7.7783	9.4142	8.4209	7.9799					8.8106	9.6055	9.6126	9.7811	9.0738	9.0822	8.5871	9.5458	8.1857	8.1973	8.2112	8.5943	8.6483	8.082	9.1126	8.1617					6.4165	7.7525	7.0881	8.8438	8.048	8.7005	9.3101	7.6215
	8	6.5988	7.1419	6.6698	7.7433	7.3045	7.8074	7.7145	7.028	6.8828	7.3984	7.7152	10.3531	7.9887	8.0599	9.467	7.2363	8.3505	9.1103	8.2798		5.2368	6.5543	7.143	8.7981	6.9801	7.5459	8.0173	6.7891	6.0676	6.3227	7.8977	7.3614	7.1908	7.2547	8.0939	6.7545	7.6946	7.4969	7.5189		4.734	4.7909	6.2141	6.3655	6.3167	7.2095	6.6556	6.6061
[truncated: 72 more columns]

## Sheet: Fig 1d
Figure 1d	eGFP RNAi day 32	mino RNAi day 32	α-syn, eGFP RNAi day 32	α-syn, mino RNAi day 32	eGFP RNAi day 49	mino RNAi day 49	α-syn, eGFP RNAi day 49	α-syn, mino RNAi day 49
	105	120	126	132	109	65	26	73
	130	138	117	147	38	23	25	25
	110	114	109	77	86	85	12	35
	156	115	117	137	81	120	26	33
	112	126	126	141	95	79	2	58
	126	130	132	118	95	71	33	108
	112	119	129	126	70	58	18	125
	116	139	136	127	90	99	40	12
	174	136	135	135	85	127	38	32
	155	132	138	117	97	98	12	15
	137	129	153	106	66	50	40	79
	145	136	150	101	42	44	43	97
	132	111	126	121	95	45	56	84
	138	119	121	85	41	59	19	81
	126	101	151	154	143	60	21	100
	114	88	117	119	48	58	19	88
	144	135	98	136	104	108	56	125
	119	127	83	127	104		25	44
	163	139	132	111	53		31	105
	154	141	112	114	28		56	103
	113	145	142	106			61	74
	118	104	137	151			54	75
	126	126	118	123			59	49
	95	124	103	133			41	55
	122	139	133	110			41	96
	121	91	126	140			21	139
	150	116	137	126			86	36
	134	120	144	143			63	100
	120	148	139	124			36	105
	117	103	112	140			33
	151	122	140	131			60
	169	139	155	108			23
	126	119	85	121			80
	133	141	98	129			56
	139	119	123	116			76
	106	150	118	110			44
	87	138	151	132			44
	112	128	136	127			28
	114	139	145	138			48
	132	133	154	124			124
	125	149	130				99
	145	139	107				57
	126	159	147				43
	114	130	121				29
	114	113	127				21
	117	124	104				53
	117	124	137				77
	134	114	114				44
	110		124				105
	102		110				40
			125
			116
			122
			135
			97
			128
			117

## Sheet: Fig 1f
Figure 1f	eGFP RNAi	mino RNAi	mino Overexpression	α-syn, eGFP RNAi	α-syn, mino RNAi	α-syn, mino overexpression
	133	129	102	105	105	89
	129	145	127	107	107	92
	142	115	123	96	85	91
	132	119	138	103	107	97
	143	108	125	101	96	103
	157	115	115	109	113	95
	104	124	111	98	121	90
	144	141	128	115	109	88
	126	147	136	113	116	111
	141	113	142	95	110	92
	131	134	128	98	109	83
	143	138	145	110	91	87
	137	149	109	106	118	82
	130	165	111	119	124	85
	100	129	96	87	115	99
	119	126	120	109	119	99
	137	84	124	93	114	92
	138	130	131	98	128	114
	123	142	117	95	107	91
	110	145	137	83	114	91
	159	133	122	107	115	87
	120	148	132	104	112	92
	156	136	135	89	119	96
	139	144	144	113	136	51
	87	135	131	95	110	71
	115	142	147	97	113	100
	134	126	144	113	101	101
	123	116	124	95	148	91
	151	132	129	89	119	76
	152	129	112	99	141	84
	147	130	133	100	106	93
	142	107	124	89	113	83
	134	143	136	101	111	95
	118	138	146	110	104	102
	132	141	103	107	110	90
	132	139		83	134	103
	137	127		122	100	98
	134	130		107	111	100
	132	139		101	127	111
	129			96	125	83
	131			108	107	97
	118			105	112	84
	134			107	117	99
	137			100	112	85
	134			104	114	110
	133			125	103	107
	139			103	94	100
	127			106	111	82
	118			92	131	95
	127			88	95	48
	113				119	51
	117				97	114
	107				89	81
	122				83	93
	135				117	97
	136				87
	138				108
	144				111
	144				125
	144				120
	133				133
	137				128
	131				115
	130				100
	127
	114
	122
	112
	123
	150
	126

## Sheet: Fig 2b
Figure 2b	Day	No α-syn	No α-syn	No α-syn	No α-syn	mino RNAi (neuronal)	mino RNAi (neuronal)	mino RNAi (neuronal)	mino RNAi (neuronal)	mino overexpression (neuronal)	mino overexpression (neuronal)	mino overexpression (neuronal)	mino overexpression (neuronal)	α-syn	α-syn	α-syn	α-syn	α-syn, mino RNAi (neuronal)	α-syn, mino RNAi (neuronal)	α-syn, mino RNAi (neuronal)	α-syn, mino RNAi (neuronal)	α-syn, mino overexpression (neuronal)	α-syn, mino overexpression (neuronal)	α-syn, mino overexpression (neuronal)	α-syn, mino overexpression (neuronal)
	1	440	441	468	398	407	356	409	436	284	454	312	369	433	340	151	308	417	643	501	775	213	125	403	178
	2	459	457	509	434	385	353	414	481	373	447	449	409	270	275	104	108	348	542	266	713	141	49	244	174
	3	443	462	552	459	474	382	497	436	391	459	379	413	338	228	63	93	387	558	248	610	146	49	215	164
	4	590	417	691	425	467	343	605	451	580	375	319	466	306	236	80	201	430	509	335	662	172	53	202	178
	5	526	343	715	464	353	398	459	382	545	321	176	440	245	161	66	109	285	438	225	510	88	10	245	162
	6	463	425	707	456	417	374	516	417	477	403	289	367	248	133	73	114	285	482	204	489	97	5	231	189
	7	537	388	729	437	424	295	573	544	497	431	310	423	207	103	26	127	333	430	325	448	134	90	151	169
	8	425	366	523	328	336	260	466	418	422	360	318	352	132	51	71	91	261	195	188	254	104	77	114	126
	9	409	393	472	363	349	315	543	376	387	401	309	288	96	54	24	75	194	183	169	134	118	78	135	99
	10	431	253	490	339	242	276	616	348	498	353	272	484	58	52	42	101	118	157	190	158	190	48	114	93

## Sheet: Fig 2c
Figure 2c	Hour	No α-syn	No α-syn	No α-syn	No α-syn	mino RNAi	mino RNAi	mino RNAi	mino RNAi	mino overexpression	mino overexpression	mino overexpression	mino overexpression	α-syn	α-syn	α-syn	α-syn	α-syn, mino RNAi	α-syn, mino RNAi	α-syn, mino RNAi	α-syn, mino RNAi	α-syn, mino overexpression	α-syn, mino overexpression	α-syn, mino overexpression	α-syn, mino overexpression
	1	0.034777	0.039058	0.055096	0.034467	0.038799	0.032483	0.046351	0.039956	0.022696	0.0058138	0.033011	0.02368	0.035743	0.039957	0.012101	0.017291	0.038838	0.051364	0.029278	0.069003	0.012413	0.0063768	0.034908	0.016038
	2	0.031883	0.032481	0.046215	0.026556	0.04505	0.03672	0.058312	0.04731	0.040201	0.041269	0.024733	0.026018	0.032436	0.041057	0.0097819	0.014278	0.05653	0.046187	0.032636	0.069963	0.016518	0.0060251	0.025183	0.021645
	3	0.036344	0.034374	0.034194	0.036276	0.029464	0.025025	0.035829	0.030379	0.024915	0.04431	0.029227	0.028022	0.012197	0.044162	0.0041716	0.018159	0.040221	0.055505	0.023674	0.059274	0.012221	0.0065035	0.027135	0.022006
	4	0.032416	0.025703	0.035351	0.027967	0.018086	0.025499	0.034595	0.033995	0.031223	0.027469	0.033028	0.026601	0.02947	0.025572	0.010698	0.012306	0.045168	0.051974	0.045403	0.069636	0.0096657	0.0055314	0.026262	0.018788
	5	0.028782	0.034034	0.02312	0.032524	0.01516	0.01705	0.022836	0.02273	0.033088	0.034343	0.035764	0.034243	0.02303	0.01814	0.0051292	0.01337	0.0327	0.04945	0.027369	0.054043	0.011405	0.0069229	0.027771	0.015604
	6	0.044132	0.057469	0.052345	0.044852	0.029436	0.025256	0.040429	0.043746	0.052484	0.028383	0.045572	0.039507	0.030075	0.033635	0.0095173	0.013128	0.03771	0.042145	0.034971	0.05754	0.018124	0.014064	0.02827	0.017967
	7	0.081791	0.095112	0.11618	0.078178	0.077097	0.059684	0.091099	0.084261	0.11687	0.1308	0.082023	0.10428	0.013284	0.024978	0.0077118	0.011566	0.036023	0.046419	0.030185	0.044538	0.013139	0.0088422	0.031687	0.021934
	8	0.076058	0.070073	0.10076	0.065479	0.065447	0.063421	0.089816	0.067284	0.097731	0.091972	0.055814	0.061722	0.0094521	0.0098544	0.0052738	0.0084077	0.018097	0.01656	0.012606	0.010932	0.010442	0.003234	0.014502	0.013341
	9	0.068124	0.05671	0.070324	0.050914	0.045094	0.053775	0.061861	0.049591	0.051049	0.054629	0.044575	0.044956	0.01336	0.0096367	0.0067182	0.0094471	0.022141	0.017904	0.014369	0.013864	0.005794	0.0022146	0.0034733	0.0097666
	10	0.049525	0.044165	0.060482	0.038254	0.043569	0.033692	0.062875	0.038645	0.033251	0.042849	0.034281	0.048629	0.014462	0.010323	0.006333	0.011831	0.019782	0.016805	0.02644	0.026646	0.012224	0.0018167	0.011087	0.008901
	11	0.046552	0.029782	0.033608	0.032239	0.036627	0.030469	0.053728	0.026164	0.031125	0.032244	0.030302	0.028115	0.0085598	0.0082952	0.0061781	0.0093238	0.018894	0.028103	0.027859	0.017315	0.01111	0.0045754	0.010918	0.011655
	12	0.038717	0.018902	0.033976	0.036542	0.031449	0.020038	0.040218	0.035498	0.023659	0.032285	0.025464	0.037933	0.011368	0.0080549	0.0040959	0.01139	0.021655	0.024031	0.031862	0.02229	0.0083333	0.0075576	0.0068913	0.009958
	13	0.049363	0.029644	0.047849	0.034939	0.038518	0.024346	0.053874	0.03317	0.03647	0.036479	0.023979	0.037289	0.017524	0.0098451	0.0091751	0.012749	0.021425	0.039726	0.021647	0.030623	0.0090181	0.004818	0.016805	0.007409
	14	0.043334	0.025674	0.056369	0.028289	0.028319	0.02171	0.043676	0.035448	0.023083	0.023329	0.022536	0.033276	0.0091633	0.0048771	0.005832	0.0084885	0.021977	0.02463	0.029663	0.025068	0.010696	0.0023434	0.017985	0.0083398
	15	0.041056	0.025904	0.033321	0.025819	0.03063	0.030485	0.04056	0.047743	0.038429	0.034192	0.029259	0.029325	0.0083818	0.0080553	0.0044963	0.0098229	0.021619	0.025825	0.028672	0.019249	0.012214	0.0022146	0.018716	0.010894
	16	0.054755	0.036699	0.07972	0.040766	0.037279	0.037392	0.061393	0.053357	0.062651	0.04173	0.035188	0.043951	0.011415	0.0098916	0.0045924	0.0079251	0.034607	0.040434	0.028702	0.021872	0.021002	0.0022299	0.018919	0.018774
	17	0.07196	0.058153	0.086535	0.056575	0.041367	0.037735	0.070692	0.066683	0.059208	0.042971	0.039021	0.06142	0.017735	0.013567	0.0057341	0.018318	0.040587	0.04646	0.044305	0.034246	0.025563	0.005251	0.029049	0.023751
	18	0.083376	0.066267	0.12039	0.067326	0.052813	0.044993	0.084527	0.07031	0.085381	0.065879	0.044126	0.072639	0.040464	0.022322	0.011287	0.025821	0.064604	0.085062	0.049478	0.054389	0.043057	0.0075418	0.030569	0.034362
	19	0.11852	0.13352	0.19322	0.12996	0.13391	0.088774	0.13316	0.13738	0.17175	0.14149	0.10719	0.15241	0.12439	0.053494	0.031204	0.05417	0.083322	0.14448	0.084893	0.14313	0.075721	0.021862	0.081752	0.062731
	20	0.10599	0.10595	0.15931	0.12624	0.10667	0.087154	0.11482	0.1037	0.11367	0.096669	0.042988	0.095381	0.084185	0.019871	0.0076683	0.019837	0.045825	0.11127	0.045286	0.13199	0.017797	0.013401	0.043126	0.023531
	21	0.068938	0.037985	0.07098	0.056299	0.050046	0.055699	0.068896	0.042083	0.037307	0.036075	0.0071649	0.032315	0.038638	0.0041695	0.0033769	0.011144	0.034833	0.069784	0.018429	0.099621	0.0058053	0.011141	0.0173	0.0099998
	22	0.035679	0.010192	0.034132	0.022932	0.019333	0.021579	0.030631	0.016283	0.014035	0.0067712	0.003341	0.011575	0.016795	0.0025209	0.0085821	0.012253	0.022245	0.035653	0.016064	0.07684	0.0061213	0.003026	0.011458	0.011259
	23	0.028687	0.0048869	0.035552	0.023567	0.022681	0.02646	0.024469	0.032576	0.02067	0.0083094	0.017954	0.017469	0.022284	0.012843	0.0083336	0.021311	0.03668	0.027799	0.013533	0.092982	0.01245	0.0050487	0.016026	0.013267
	24	0.041201	0.023111	0.047635	0.022773	0.033587	0.031626	0.051442	0.033105	0.016282	0.011965	0.023745	0.023412	0.023648	0.018685	0.0064552	0.016278	0.033966	0.051257	0.018951	0.075391	0.0088889	0.0096814	0.020779	0.013641

## Sheet: Fig 2d
Figure 2d	Morning peak
		No α-syn	No α-syn	No α-syn	No α-syn	mino RNAi	mino RNAi	mino RNAi	mino RNAi	mino overexpression	mino overexpression	mino overexpression	mino overexpression	α-syn	α-syn	α-syn	α-syn	α-syn, mino RNAi	α-syn, mino RNAi	α-syn, mino RNAi	α-syn, mino RNAi	α-syn, mino overexpression	α-syn, mino overexpression	α-syn, mino overexpression	α-syn, mino overexpression
	6	15.8875	20.6888	18.8441	16.1467	10.5968	9.0921	14.5545	15.7485	18.8943	10.2179	16.4059	14.2225	10.8268	12.1088	3.4262	4.7262	13.5757	15.1721	12.5894	20.7145	6.5245	5.0632	10.1771	6.4682
	7	29.4447	34.2402	41.8261	28.1439	27.7549	21.4861	32.7955	30.3339	42.0746	47.0885	29.5283	37.5416	4.7822	8.9919	2.7763	4.1639	12.9682	16.7107	10.8666	16.0335	4.7301	3.1832	11.4075	7.8961
	8	27.381	25.2264	36.273	23.5723	23.5611	22.8316	32.3336	24.2224	35.1831	33.1101	20.093	22.2199	3.4028	3.5476	1.8986	3.0268	6.515	5.9615	4.5381	3.9354	3.7591	1.1642	5.2207	4.8028
	Evening peak
		No α-syn	No α-syn	No α-syn	No α-syn	mino RNAi	mino RNAi	mino RNAi	mino RNAi	mino overexpression	mino overexpression	mino overexpression	mino overexpression	α-syn	α-syn	α-syn	α-syn	α-syn, mino RNAi	α-syn, mino RNAi	α-syn, mino RNAi	α-syn, mino RNAi	α-syn, mino overexpression	α-syn, mino overexpression	α-syn, mino overexpression	α-syn, mino overexpression
	18	30.0155	23.8563	43.3412	24.2374	19.0125	16.1974	30.4298	25.3116	30.7372	23.7164	15.8854	26.1499	14.5671	8.0358	4.0634	9.2955	23.2573	30.6223	17.8123	19.5799	15.5004	2.715	11.005	12.3705
	19	42.6657	48.0681	69.5609	46.785	48.2072	31.9585	47.9384	49.4557	61.8284	50.9346	38.5889	54.8682	44.7807	19.2579	11.2333	19.5011	29.9958	52.0116	30.5616	51.5258	27.2595	7.8703	29.4308	22.5831
	20	38.1559	38.1404	57.3504	45.4462	38.4014	31.3756	41.3341	37.3314	40.9202	34.8007	15.4755	34.3373	30.3066	7.1537	2.7606	7.1415	16.4971	40.057	16.3029	47.5152	6.407	4.8243	15.5253	8.4711

## Sheet: Fig 2e
Fiogure 2e	hour	No α-syn	mino RNAi	mino overexpression	α-syn	α-syn, mino RNAi	α-syn, mino overexpression
	0	0.17705	0.21952	0.097383	0.11652	0.33321	0.10592
	0.016678	0.20418	0.23183	0.12059	0.10906	0.2972	0.12088
	0.033356	0.23941	0.26873	0.13886	0.11562	0.2622	0.12445
	0.050035	0.34228	0.33578	0.13339	0.16188	0.29151	0.12032
	0.066713	0.39576	0.31386	0.13208	0.20654	0.33045	0.14318
	0.083391	0.34303	0.2201	0.14109	0.17722	0.31008	0.16507
	0.10007	0.30695	0.22047	0.16359	0.14093	0.2398	0.15235
	0.11675	0.31208	0.264	0.17031	0.13667	0.18433	0.13039
	0.13343	0.3449	0.24366	0.14915	0.12286	0.227	0.11854
	0.1501	0.3287	0.21122	0.14069	0.10591	0.28152	0.096272
	0.16678	0.29499	0.18885	0.15064	0.11344	0.29547	0.077479
	0.18346	0.28746	0.18268	0.15959	0.14491	0.28992	0.10113
	0.20014	0.27822	0.19426	0.15032	0.16165	0.27903	0.098199
	0.21682	0.26171	0.17449	0.12546	0.16002	0.28907	0.080714
	0.2335	0.23425	0.12202	0.11636	0.1562	0.3089	0.095569
	0.25017	0.22522	0.1345	0.099175	0.17272	0.3074	0.11332
	0.26685	0.25943	0.26008	0.084066	0.17496	0.27499	0.10413
	0.28353	0.30702	0.33943	0.078932	0.15763	0.26814	0.092199
	0.30021	0.33942	0.29992	0.050946	0.14355	0.31813	0.077613
	0.31689	0.34599	0.28079	0.015588	0.13186	0.32841	0.077985
	0.33356	0.30948	0.24936	0.01027	0.14897	0.30285	0.10285
	0.35024	0.2664	0.21521	0.012701	0.1855	0.25417	0.095209
	0.36692	0.25706	0.20432	0.017415	0.17449	0.2173	0.057747
	0.3836	0.23335	0.21315	0.035433	0.1475	0.19908	0.074057
	0.40028	0.22151	0.23176	0.056328	0.11869	0.18046	0.10975
	0.41696	0.24289	0.227	0.077589	0.11676	0.18287	0.10688
	0.43363	0.25198	0.21395	0.085982	0.13268	0.1979	0.082031
	0.45031	0.26147	0.21115	0.073831	0.16083	0.22223	0.07435
	0.46699	0.26069	0.22225	0.05687	0.17796	0.26481	0.097475
	0.48367	0.25857	0.18436	0.049123	0.18543	0.31119	0.11571
	0.50035	0.23788	0.16922	0.061771	0.22085	0.37029	0.11819
	0.51703	0.24477	0.22069	0.078316	0.21476	0.40991	0.11887
	0.5337	0.29092	0.24906	0.096783	0.18092	0.38869	0.11373
	0.55038	0.27362	0.21071	0.11903	0.19463	0.34449	0.11755
	0.56706	0.2444	0.18301	0.10745	0.17963	0.35082	0.13718
	0.58374	0.24734	0.21103	0.10355	0.1877	0.36322	0.15085
	0.60042	0.25625	0.24538	0.10476	0.22418	0.30287	0.16125
	0.6171	0.2258	0.2556	0.10222	0.23384	0.24741	0.13259
	0.63377	0.16484	0.258	0.10255	0.22171	0.23125	0.093927
	0.65045	0.13143	0.29244	0.11423	0.20279	0.23048	0.11143
	0.66713	0.14551	0.31633	0.13275	0.17739	0.23575	0.16335
	0.68381	0.1422	0.27704	0.14529	0.14947	0.23063	0.21354
	0.70049	0.11739	0.26301	0.16699	0.16499	0.23502	0.23993
	0.71716	0.13472	0.29344	0.18454	0.15908	0.23735	0.18721
	0.73384	0.16608	0.28062	0.17589	0.12805	0.23208	0.096635
	0.75052	0.19505	0.23904	0.1619	0.13019	0.24827	0.049714
	0.7672	0.201	0.19965	0.17021	0.15386	0.30907	0.057856
	0.78388	0.18559	0.21428	0.19871	0.16595	0.32852	0.065991
	0.80056	0.20392	0.25628	0.19971	0.15184	0.31547	0.050637
	0.81723	0.22521	0.24363	0.18872	0.13663	0.31883	0.065531
	0.83391	0.24157	0.22774	0.18305	0.13721	0.31696	0.087283
	0.85059	0.26132	0.25451	0.15917	0.11748	0.32352	0.093232
	0.86727	0.25775	0.29473	0.15391	0.10475	0.38637	0.080467
	0.88395	0.23113	0.28503	0.16207	0.12542	0.41106	0.069771
	0.90063	0.21806	0.27308	0.18043	0.15906	0.36338	0.078888
	0.9173	0.21661	0.25486	0.20928	0.16674	0.33798	0.062939
	0.93398	0.20341	0.22995	0.23349	0.16578	0.30184	0.039379
	0.95066	0.19654	0.2161	0.24687	0.15757	0.22112	0.054897
	0.96734	0.21921	0.19269	0.25682	0.14764	0.16277	0.075508
	0.98402	0.23477	0.19713	0.27388	0.13916	0.1585	0.076105
	1.0007	0.22966	0.26743	0.29079	0.12764	0.17678	0.083919
	1.0174	0.2046	0.3192	0.3219	0.12901	0.20613	0.094503
	1.0341	0.22439	0.30273	0.32437	0.15706	0.22852	0.087216
	1.0507	0.25825	0.34622	0.29695	0.18689	0.26947	0.10225
	1.0674	0.23804	0.39902	0.27651	0.18448	0.3054	0.15202
	1.0841	0.19487	0.39712	0.2663	0.17258	0.31091	0.18438
	1.1008	0.21436	0.36647	0.23541	0.19721	0.2819	0.19775
	1.1174	0.23057	0.33181	0.21326	0.22087	0.30707	0.20218
	1.1341	0.21313	0.31747	0.2066	0.23997	0.37992	0.19404
	1.1508	0.20561	0.28912	0.18004	0.2547	0.37935	0.19341
	1.1675	0.23744	0.24665	0.14226	0.26369	0.30409	0.1636
	1.1842	0.25946	0.26432	0.11966	0.2431	0.25316	0.12237
	1.2008	0.21706	0.32514	0.12716	0.21297	0.23383	0.11223
	1.2175	0.16783	0.32634	0.1446	0.21549	0.23095	0.11109
	1.2342	0.14098	0.27602	0.13653	0.21477	0.24116	0.094226
	1.2509	0.12659	0.24957	0.10703	0.17461	0.28179	0.10458
	1.2675	0.14636	0.27739	0.087981	0.15274	0.30952	0.11318
	1.2842	0.1873	0.32478	0.082989	0.15179	0.29361	0.094439
	1.3009	0.23337	0.31737	0.060205	0.1378	0.27402	0.090707
	1.3176	0.21569	0.28249	0.050875	0.11856	0.28407	0.074804
	1.3343	0.16842	0.24978	0.068057	0.12253	0.31503	0.050539
	1.3509	0.16989	0.27156	0.087393	0.1451	0.33367	0.046938
	1.3676	0.21185	0.33059	0.10046	0.16847	0.32619	0.044139
	1.3843	0.23578	0.36855	0.098947	0.1727	0.3599	0.025387
	1.401	0.22441	0.35173	0.10681	0.15355	0.39175	0.027024
	1.4177	0.21379	0.2663	0.14665	0.14426	0.40625	0.055764
	1.4343	0.21062	0.18497	0.17159	0.12195	0.43485	0.086988
	1.451	0.20729	0.13826	0.1799	0.11182	0.41708	0.089435
	1.4677	0.21844	0.14729	0.18607	0.13306	0.39393	0.072929
	1.4844	0.22489	0.18843	0.18906	0.14198	0.39409	0.072543
	1.501	0.20275	0.19501	0.18606	0.13714	0.41944	0.059246
	1.5177	0.20582	0.21255	0.19532	0.11079	0.44556	0.051727
	1.5344	0.22725	0.27914	0.21668	0.07954	0.41938	0.075111
	1.5511	0.23247	0.3237	0.1839	0.075513	0.37261	0.096934
	1.5678	0.21435	0.31895	0.19803	0.11187	0.29678	0.082898
	1.5844	0.19642	0.31386	0.19422	0.11899	0.24567	0.067364
	1.6011	0.15625	0.27172	0.14946	0.097929	0.26289	0.07577
	1.6178	0.12463	0.26996	0.13687	0.088999	0.24008	0.097516
	1.6345	0.12321	0.3082	0.16828	0.098191	0.20214	0.098716
	1.6511	0.12869	0.27089	0.20686	0.099815	0.22629	0.083338
	1.6678	0.1382	0.22121	0.21792	0.11808	0.21717	0.09247
	1.6845	0.13516	0.19166	0.2251	0.13726	0.21109	0.13193
	1.7012	0.14746	0.18442	0.24781	0.13521	0.25155	0.17052
	1.7179	0.19055	0.20224	0.2376	0.12556	0.29616	0.18579
	1.7345	0.23604	0.26787	0.23408	0.13117	0.28637	0.16691
	1.7512	0.22903	0.31663	0.25674	0.12404	0.25406	0.14425
	1.7679	0.21428	0.31188	0.27127	0.12174	0.24592	0.13753
	1.7846	0.23793	0.24217	0.26839	0.14678	0.22368	0.089605
	1.8013	0.24082	0.18347	0.27546	0.1495	0.20383	0.04794
	1.8179	0.25372	0.24681	0.30202	0.13978	0.21161	0.053491
	1.8346	0.2342	0.32563	0.30625	0.13589	0.24488	0.065898
	1.8513	0.20973	0.34116	0.27517	0.15623	0.27931	0.087527
	1.868	0.19681	0.31293	0.26464	0.17745	0.32073	0.1171
	1.8846	0.16059	0.30662	0.24208	0.18337	0.34919	0.1209
	1.9013	0.14446	0.32459	0.18264	0.17847	0.37743	0.12096
	1.918	0.17411	0.3346	0.18915	0.15027	0.41107	0.12724
	1.9347	0.2274	0.30093	0.26479	0.12646	0.40355	0.12579
	1.9514	0.2803	0.25943	0.28131	0.073569	0.39705	0.11116
	1.968	0.32733	0.25542	0.2652	0.035681	0.41721	0.09705
	1.9847	0.32127	0.24741	0.25015	0.043109	0.42139	0.11613
	2.0014	0.26451	0.24932	0.23358	0.047766	0.4111	0.12277
	2.0181	0.21534	0.26006	0.24414	0.069604	0.39624	0.10312
	2.0347	0.21057	0.24393	0.25336	0.089513	0.39035	0.096103
	2.0514	0.19215	0.23842	0.23214	0.089244	0.42545	0.093463
	2.0681	0.15378	0.2366	0.25245	0.078445	0.45319	0.095698
	2.0848	0.14079	0.23244	0.29202	0.058252	0.44981	0.12506
	2.1015	0.14593	0.25539	0.28348	0.051263	0.43976	0.13985
	2.1181	0.14967	0.24274	0.22917	0.056582	0.40127	0.15336
	2.1348	0.16045	0.1998	0.20988	0.10209	0.35169	0.15388
	2.1515	0.19235	0.20379	0.23069	0.16296	0.3244	0.15585
	2.1682	0.21808	0.1761	0.25073	0.19098	0.29865	0.15691
	2.1849	0.25201	0.13092	0.21505	0.16767	0.3293	0.13359
	2.2015	0.25765	0.11102	0.15876	0.1446	0.34021	0.12344
	2.2182	0.20551	0.1176	0.12969	0.1341	0.31945	0.12814
	2.2349	0.16798	0.13334	0.16182	0.13965	0.27676	0.13001
	2.2516	0.18007	0.13794	0.21758	0.15903	0.22028	0.098685
	2.2682	0.19943	0.15704	0.2226	0.14822	0.23283	0.075661
	2.2849	0.21098	0.17455	0.20507	0.11342	0.25405	0.08458
	2.3016	0.2454	0.16218	0.19844	0.10854	0.22811	0.084308
	2.3183	0.25398	0.15045	0.20805	0.11354	0.20186	0.085999
	2.335	0.24011	0.14973	0.22805	0.09468	0.19271	0.10076
	2.3516	0.23297	0.16956	0.2202	0.083636	0.17913	0.086379
	2.3683	0.19605	0.21475	0.18066	0.099642	0.18406	0.082784
	2.385	0.15868	0.24695	0.16541	0.12281	0.19392	0.099872
	2.4017	0.14473	0.26973	0.16272	0.13717	0.1819	0.11495
	2.4183	0.13431	0.27057	0.15759	0.14662	0.19541	0.11707
	2.435	0.12474	0.27749	0.15526	0.15718	0.22615	0.10337
	2.4517	0.12924	0.28954	0.15763	0.15809	0.22038	0.077615
	2.4684	0.14934	0.24807	0.16333	0.15311	0.17511	0.084718
	2.4851	0.16728	0.20926	0.13906	0.12159	0.14573	0.1004
	2.5017	0.19792	0.19203	0.10307	0.086043	0.14736	0.10845
	2.5184	0.24765	0.1961	0.10402	0.091811	0.13003	0.094909
	2.5351	0.2683	0.21546	0.14048	0.098059	0.12623	0.062497
	2.5518	0.23738	0.19929	0.17614	0.091676	0.20005	0.069445
	2.5685	0.25144	0.15168	0.20438	0.11148	0.23814	0.091958
	2.5851	0.28817	0.10238	0.22023	0.12671	0.23286	0.10397
	2.6018	0.26259	0.09432	0.17493	0.11463	0.25081	0.10441
	2.6185	0.21463	0.11234	0.11456	0.092604	0.2704	0.094076
	2.6352	0.20647	0.15488	0.099897	0.089955	0.23373	0.08
	2.6518	0.2158	0.20262	0.16539	0.09915	0.20219	0.084495
	2.6685	0.23749	0.21742	0.22134	0.091211	0.22116	0.10713
	2.6852	0.2491	0.19804	0.19392	0.084792	0.25882	0.11386
	2.7019	0.28737	0.20122	0.15107	0.076318	0.30763	0.10975
	2.7186	0.33033	0.20596	0.11561	0.069156	0.30952	0.12865
	2.7352	0.31807	0.21279	0.10667	0.089557	0.22971	0.12315
	2.7519	0.30933	0.19564	0.1133	0.12517	0.16164	0.095522
	2.7686	0.32115	0.16419	0.12999	0.1272	0.18081	0.081152
	2.7853	0.33471	0.13637	0.1788	0.1261	0.22375	0.073654
	2.8019	0.31838	0.12247	0.23276	0.13083	0.25638	0.067429
	2.8186	0.27255	0.11923	0.23377	0.11001	0.29437	0.050928
	2.8353	0.22457	0.096474	0.21941	0.11986	0.27533	0.043871
	2.852	0.18229	0.089361	0.21292	0.16825	0.21538	0.052989
	2.8687	0.15614	0.12066	0.21033	0.20029	0.21431	0.075154
	2.8853	0.15606	0.1381	0.22477	0.18351	0.25751	0.097831
	2.902	0.1547	0.13865	0.247	0.16505	0.27705	0.099129
	2.9187	0.15602	0.15508	0.25358	0.14702	0.31882	0.093671
	2.9354	0.16133	0.17389	0.20954	0.15091	0.36087	0.11656
	2.9521	0.16216	0.16233	0.16399	0.16203	0.35679	0.13179
	2.9687	0.15179	0.13545	0.1564	0.1485	0.36424	0.12795
	2.9854	0.13898	0.09899	0.14582	0.1042	0.32551	0.11504
	3.0021	0.12604	0.06598	0.1253	0.06903	0.27282	0.090308
	3.0188	0.14274	0.062952	0.12212	0.073999	0.29384	0.072654
	3.0354	0.19502	0.098617	0.13147	0.083478	0.33358	0.040583
	3.0521	0.2355	0.1572	0.15961	0.066973	0.34341	0.020926
	3.0688	0.21462	0.23712	0.18607	0.06456	0.34557	0.046439
	3.0855	0.18147	0.34291	0.18993	0.10661	0.40673	0.087197
	3.1022	0.16856	0.39622	0.17997	0.15615	0.48744	0.11983
	3.1188	0.19023	0.33986	0.15421	0.16256	0.4809	0.15271
	3.1355	0.20745	0.21262	0.13046	0.15203	0.47358	0.15134
	3.1522	0.18252	0.10243	0.1549	0.14759	0.52537	0.12397
	3.1689	0.19484	0.104	0.23174	0.13508	0.54684	0.11258
	3.1855	0.23685	0.14501	0.3007	0.11947	0.52354	0.10347
	3.2022	0.27818	0.16327	0.32026	0.13106	0.48358	0.091886
	3.2189	0.29105	0.17791	0.29034	0.17582	0.43203	0.096651
	3.2356	0.26579	0.13954	0.23263	0.19541	0.3746	0.10351
	3.2523	0.25736	0.094734	0.20785	0.18472	0.3065	0.096172
	3.2689	0.2736	0.14033	0.21213	0.17954	0.28343	0.073038
	3.2856	0.27977	0.18749	0.22392	0.18781	0.32724	0.067118
	3.3023	0.2975	0.15993	0.23221	0.19257	0.35616	0.10463
	3.319	0.30238	0.13735	0.22472	0.1875	0.3721	0.14811
	3.3356	0.28391	0.15501	0.19959	0.16121	0.39754	0.17213
	3.3523	0.30431	0.16715	0.1745	0.133	0.38628	0.15195
	3.369	0.37781	0.15247	0.14872	0.12263	0.31553	0.10366
	3.3857	0.36243	0.13636	0.11554	0.11741	0.28774	0.072026
	3.4024	0.25168	0.11001	0.10102	0.1118	0.32186	0.071053
	3.419	0.18391	0.084311	0.11936	0.10127	0.33237	0.073341
	3.4357	0.18423	0.084209	0.15155	0.10882	0.29636	0.062166
	3.4524	0.21639	0.11912	0.17045	0.13892	0.23884	0.062537
	3.4691	0.23781	0.14277	0.17141	0.159	0.22727	0.055093
	3.4858	0.24721	0.12823	0.17046	0.14186	0.21604	0.040013
	3.5024	0.25533	0.11327	0.19457	0.11015	0.22665	0.053316
	3.5191	0.21238	0.14314	0.20155	0.090993	0.21376	0.068658
	3.5358	0.15828	0.19684	0.17503	0.095839	0.17256	0.060229
	3.5525	0.15344	0.22385	0.15914	0.11007	0.20892	0.063543
	3.5691	0.14887	0.22345	0.16278	0.098701	0.26406	0.075176
	3.5858	0.1299	0.22467	0.17472	0.096359	0.30417	0.082603
	3.6025	0.12548	0.1957	0.18504	0.11271	0.32515	0.081634
	3.6192	0.12639	0.17665	0.20063	0.1142	0.30956	0.088108
	3.6359	0.10616	0.16131	0.19747	0.11867	0.28965	0.11183
	3.6525	0.10571	0.1645	0.18387	0.099793	0.28232	0.11826
	3.6692	0.15492	0.18511	0.16938	0.086969	0.2904	0.10695
	3.6859	0.1763	0.20534	0.17891	0.094635	0.32835	0.11248
	3.7026	0.14411	0.20405	0.19944	0.083308	0.31448	0.12105
	3.7192	0.1311	0.16498	0.19053	0.07133	0.28449	0.10229
	3.7359	0.14913	0.13929	0.19803	0.067672	0.335	0.08381
	3.7526	0.15313	0.14779	0.19598	0.074107	0.36964	0.056148
	3.7693	0.12985	0.1492	0.17207	0.099431	0.33574	0.056857
	3.786	0.12847	0.16361	0.17161	0.14008	0.28758	0.057387
	3.8026	0.1068	0.18755	0.16585	0.1491	0.26561	0.065259
	3.8193	0.090613	0.19534	0.15694	0.14718	0.27297	0.085564
	3.836	0.097407	0.16598	0.12111	0.14023	0.26683	0.096845
	3.8527	0.094068	0.15488	0.080746	0.12116	0.24141	0.11797
	3.8694	0.086598	0.16108	0.069594	0.11205	0.23792	0.12048
	3.886	0.075242	0.16352	0.11981	0.09406	0.25336	0.10644
	3.9027	0.054161	0.18163	0.18117	0.074001	0.28682	0.091048
	3.9194	0.039291	0.19066	0.1769	0.07108	0.29626	0.096545
	3.9361	0.065453	0.20881	0.16336	0.066786	0.25519	0.1075
	3.9527	0.11567	0.22016	0.19489	0.058844	0.19861	0.11381
	3.9694	0.14481	0.17474	0.20346	0.06717	0.17263	0.088515
	3.9861	0.098997	0.16355	0.1712	0.089504	0.21717	0.064836
	4.0028	0.051186	0.14445	0.15732	0.095349	0.25189	0.07525
	4.0195	0.050189	0.098739	0.16937	0.094359	0.22475	0.081678
	4.0361	0.055897	0.079745	0.16529	0.071578	0.25327	0.094898
	4.0528	0.066841	0.06465	0.13815	0.077481	0.33508	0.12082
	4.0695	0.10441	0.059822	0.11919	0.12655	0.37167	0.11618
	4.0862	0.14451	0.060682	0.11815	0.14572	0.35149	0.11415
	4.1028	0.15208	0.048112	0.13423	0.11627	0.33329	0.11472
	4.1195	0.1467	0.043342	0.17382	0.073763	0.30555	0.096993
	4.1362	0.13736	0.068407	0.21104	0.053525	0.29153	0.060416
	4.1529	0.12459	0.097773	0.21116	0.047059	0.27613	0.04065
	4.1696	0.11387	0.093438	0.21014	0.031161	0.23222	0.041816
	4.1862	0.12744	0.079174	0.22112	0.02922	0.18465	0.0439
	4.2029	0.16683	0.087073	0.19939	0.044845	0.15704	0.044459
	4.2196	0.18439	0.096807	0.15282	0.038616	0.17781	0.045987
	4.2363	0.17864	0.083541	0.13538	0.021436	0.22686	0.06017
	4.253	0.19774	0.082135	0.1613	0.022278	0.2538	0.060615
	4.2696	0.19279	0.071253	0.18451	0.026411	0.25471	0.061285
	4.2863	0.16349	0.044131	0.16979	0.031106	0.2528	0.063802
	4.303	0.13365	0.045392	0.13659	0.045927	0.24225	0.053349
	4.3197	0.10305	0.066229	0.13244	0.055372	0.22038	0.058183
	4.3363	0.11894	0.0831	0.13699	0.057838	0.19486	0.062135
	4.353	0.16061	0.13222	0.15435	0.053147	0.2055	0.07337
	4.3697	0.207	0.18455	0.16153	0.048478	0.24294	0.10801
	4.3864	0.25193	0.17395	0.16182	0.048661	0.27994	0.10207
	4.4031	0.25372	0.15061	0.14185	0.045018	0.30545	0.085448
	4.4197	0.23533	0.12638	0.1079	0.062788	0.29316	0.094807
	4.4364	0.18618	0.095545	0.09727	0.080347	0.26472	0.11273
	4.4531	0.14923	0.079115	0.13401	0.076088	0.26074	0.11798
	4.4698	0.12892	0.067343	0.17548	0.082899	0.26802	0.10268
	4.4864	0.097288	0.061172	0.20565	0.10693	0.28101	0.097953
	4.5031	0.074519	0.091837	0.21217	0.12108	0.28265	0.12523
	4.5198	0.07261	0.10397	0.18776	0.11645	0.29305	0.12643
	4.5365	0.098143	0.091286	0.13495	0.10267	0.31092	0.097119
	4.5532	0.14675	0.10879	0.08779	0.10849	0.34347	0.10156
	4.5698	0.18333	0.13568	0.097084	0.11685	0.37277	0.12063
	4.5865	0.17418	0.15643	0.13766	0.11924	0.33766	0.11808
	4.6032	0.16524	0.14554	0.18448	0.11547	0.30587	0.11465
	4.6199	0.21215	0.13671	0.23357	0.10107	0.32157	0.11161
	4.6366	0.25505	0.13074	0.2541	0.070597	0.2862	0.10414
	4.6532	0.24523	0.10751	0.28214	0.091422	0.22028	0.090304
	4.6699	0.23453	0.091224	0.30664	0.14638	0.17025	0.083398
	4.6866	0.23744	0.073961	0.26757	0.1491	0.12275	0.081405
	4.7033	0.21584	0.069431	0.21085	0.13805	0.14967	0.079694
	4.7199	0.20119	0.095631	0.20226	0.11241	0.24418	0.10695
	4.7366	0.20311	0.14422	0.22554	0.069463	0.30927	0.1372
	4.7533	0.21162	0.19359	0.2279	0.072477	0.29907	0.13565
	4.77	0.21479	0.19305	0.21406	0.10582	0.25552	0.1276
	4.7867	0.20337	0.14238	0.21726	0.12086	0.21451	0.11326
	4.8033	0.21787	0.12779	0.22154	0.091213	0.18397	0.088503
	4.82	0.21607	0.16085	0.23552	0.085043	0.16698	0.069574
	4.8367	0.19502	0.20282	0.27637	0.1114	0.16118	0.071518
	4.8534	0.21593	0.22375	0.34503	0.14212	0.14368	0.084694
	4.87	0.27436	0.20742	0.38975	0.15803	0.16232	0.10244
	4.8867	0.32058	0.19501	0.37538	0.16259	0.18816	0.11516
	4.9034	0.31978	0.13718	0.35438	0.16121	0.18279	0.13156
	4.9201	0.25338	0.11637	0.35406	0.13515	0.17507	0.13199
	4.9368	0.21458	0.18081	0.35666	0.12106	0.17764	0.097665
	4.9534	0.24997	0.22238	0.36309	0.10938	0.18077	0.067538
	4.9701	0.2441	0.19558	0.34164	0.10495	0.18033	0.088867
	4.9868	0.20588	0.14902	0.29421	0.10008	0.18453	0.12237
	5.0035	0.21551	0.14452	0.21387	0.096535	0.16329	0.13037
	5.0202	0.19221	0.15996	0.1431	0.10929	0.13517	0.13326
	5.0368	0.16228	0.14748	0.10148	0.10669	0.13864	0.14105
	5.0535	0.15412	0.12745	0.10927	0.097837	0.1612	0.14099
	5.0702	0.11194	0.12021	0.13666	0.11462	0.15628	0.10673
	5.0869	0.10319	0.12655	0.1323	0.15363	0.13125	0.06044
	5.1035	0.14559	0.12941	0.12233	0.165	0.1065	0.035117
	5.1202	0.19969	0.094018	0.13417	0.15159	0.10462	0.047143
	5.1369	0.23682	0.060717	0.15907	0.17614	0.14918	0.085813
	5.1536	0.23124	0.065579	0.19742	0.15747	0.18548	0.10632
	5.1703	0.22128	0.078425	0.20921	0.12098	0.16582	0.099053
	5.1869	0.25455	0.080124	0.1833	0.10774	0.14221	0.11431
	5.2036	0.2703	0.082165	0.16712	0.10395	0.14039	0.13477
	5.2203	0.25592	0.08594	0.19425	0.11331	0.17511	0.11194
	5.237	0.25712	0.08199	0.21342	0.12505	0.22473	0.081311
	5.2536	0.24153	0.10512	0.19683	0.1331	0.23205	0.064508
	5.2703	0.21042	0.14916	0.18513	0.14388	0.23579	0.06749
	5.287	0.18103	0.14212	0.21728	0.12398	0.23804	0.080322
	5.3037	0.18042	0.11294	0.23518	0.10332	0.26003	0.099986
	5.3204	0.19638	0.092467	0.15963	0.096155	0.29254	0.09254
	5.337	0.17733	0.077481	0.08223	0.093725	0.27389	0.063941
	5.3537	0.14966	0.098023	0.078576	0.10392	0.26063	0.057819
	5.3704	0.17512	0.13951	0.1188	0.10667	0.27739	0.081486
	5.3871	0.21555	0.16789	0.17748	0.10481	0.29782	0.093982
	5.4038	0.24689	0.18562	0.19196	0.09086	0.28258	0.097573
	5.4204	0.2914	0.19281	0.17534	0.085768	0.24637	0.10619
	5.4371	0.30153	0.21394	0.16379	0.10755	0.28848	0.13368
	5.4538	0.2908	0.23785	0.16395	0.12743	0.33831	0.14031
	5.4705	0.30841	0.20488	0.16077	0.12787	0.35149	0.125
	5.4871	0.28199	0.15253	0.13011	0.12798	0.34781	0.13206
	5.5038	0.2157	0.13069	0.10058	0.13602	0.32487	0.1662
	5.5205	0.20122	0.14274	0.10247	0.13729	0.29497	0.16911
	5.5372	0.20006	0.1477	0.17654	0.12493	0.30307	0.15899
	5.5539	0.19273	0.14927	0.23636	0.11353	0.33978	0.13331
	5.5705	0.20299	0.16501	0.22692	0.12143	0.37736	0.10051
	5.5872	0.22675	0.1693	0.22101	0.13667	0.37139	0.11424
	5.6039	0.25698	0.14645	0.23792	0.13273	0.32064	0.11431
	5.6206	0.28163	0.15413	0.25597	0.13339	0.25924	0.067689
	5.6372	0.29424	0.21941	0.27155	0.18761	0.25658	0.061917
	5.6539	0.36294	0.28947	0.29041	0.21829	0.30494	0.10604
	5.6706	0.44849	0.30286	0.33151	0.1804	0.35676	0.13385
	5.6873	0.44525	0.31811	0.34206	0.15531	0.39411	0.12965
	5.704	0.42319	0.34049	0.31871	0.15079	0.37154	0.12876
	5.7206	0.42602	0.35572	0.34503	0.1472	0.29049	0.1536
	5.7373	0.41131	0.34325	0.34323	0.14841	0.26286	0.15033
	5.754	0.39656	0.30101	0.32831	0.16879	0.29091	0.13407
	5.7707	0.37077	0.2743	0.34961	0.20084	0.33608	0.13725
	5.7874	0.35255	0.26457	0.3841	0.209	0.35622	0.1183
	5.804	0.36419	0.27304	0.40657	0.17626	0.34362	0.097848
	5.8207	0.3465	0.26635	0.39719	0.15766	0.33275	0.11276
	5.8374	0.35636	0.27578	0.35665	0.14572	0.32041	0.13454
	5.8541	0.41806	0.32711	0.36845	0.13126	0.32119	0.15461
	5.8707	0.49715	0.34303	0.40073	0.10091	0.28921	0.15905
	5.8874	0.52735	0.34864	0.44954	0.097603	0.23713	0.13395
	5.9041	0.49402	0.37616	0.5107	0.11506	0.20502	0.14803
	5.9208	0.47878	0.39245	0.51835	0.12341	0.19097	0.17034
	5.9375	0.4881	0.43233	0.48985	0.10722	0.20138	0.19821
	5.9541	0.53709	0.47711	0.43751	0.078415	0.21658	0.19942
	5.9708	0.60203	0.47107	0.42505	0.074223	0.25158	0.16781
	5.9875	0.61257	0.44354	0.45823	0.084797	0.28823	0.13805
	6.0042	0.55197	0.43693	0.47519	0.12425	0.29877	0.15854
	6.0208	0.48859	0.42938	0.48106	0.15243	0.28908	0.20903
	6.0375	0.51523	0.42856	0.50959	0.13737	0.27941	0.22815
	6.0542	0.55252	0.39211	0.54941	0.11291	0.26668	0.21288
	6.0709	0.54517	0.34927	0.56295	0.11532	0.2483	0.196
	6.0876	0.50397	0.35412	0.55419	0.11911	0.26637	0.19788
	6.1042	0.4549	0.3847	0.51266	0.093688	0.27247	0.17445
	6.1209	0.43913	0.40604	0.4666	0.07129	0.2506	0.13542
	6.1376	0.47524	0.41773	0.4607	0.04464	0.26045	0.1152
	6.1543	0.51116	0.41862	0.49114	0.028261	0.31322	0.096109
	6.171	0.54054	0.41483	0.58248	0.019058	0.30706	0.10743
	6.1876	0.63033	0.42787	0.58576	0.029597	0.27846	0.13185
	6.2043	0.67799	0.37521	0.54125	0.047621	0.28826	0.11784
	6.221	0.57713	0.31373	0.51074	0.053992	0.29458	0.072803
	6.2377	0.51527	0.30995	0.46625	0.065948	0.28305	0.044633
	6.2543	0.53483	0.30241	0.45336	0.087091	0.29047	0.061328
	6.271	0.55046	0.31151	0.47267	0.10382	0.28085	0.12765
	6.2877	0.60466	0.40123	0.53654	0.16427	0.29139	0.17975
	6.3044	0.61666	0.47916	0.64058	0.22363	0.3325	0.17855
	6.3211	0.53115	0.42141	0.69618	0.19671	0.34585	0.14004
	6.3377	0.5069	0.36724	0.7282	0.13246	0.30592	0.094788
	6.3544	0.5337	0.3952	0.71501	0.11669	0.26415	0.083644
	6.3711	0.55126	0.3882	0.68562	0.1494	0.26203	0.075925
	6.3878	0.56578	0.37169	0.67764	0.15738	0.29691	0.076887
	6.4044	0.54432	0.35941	0.63909	0.15321	0.33625	0.10113
	6.4211	0.53433	0.36395	0.59924	0.14725	0.38	0.11056
	6.4378	0.55178	0.44219	0.60261	0.12587	0.42173	0.10407
	6.4545	0.60003	0.48471	0.63203	0.094975	0.41034	0.1187
	6.4712	0.60694	0.49028	0.65038	0.077629	0.3592	0.14841
	6.4878	0.59089	0.47502	0.66903	0.09857	0.34072	0.1486
	6.5045	0.57528	0.42608	0.68998	0.10867	0.32013	0.11821
	6.5212	0.5362	0.47865	0.70389	0.12767	0.25557	0.096997
	6.5379	0.50855	0.50426	0.69829	0.10464	0.21025	0.099217
	6.5546	0.49406	0.48834	0.6915	0.058816	0.21414	0.08838
	6.5712	0.52918	0.48353	0.69869	0.045368	0.21349	0.067402
	6.5879	0.54224	0.5495	0.71533	0.034838	0.22023	0.068768
	6.6046	0.52222	0.60131	0.74755	0.026517	0.21986	0.079951
	6.6213	0.56719	0.5654	0.76158	0.020838	0.20396	0.10724
	6.6379	0.54944	0.56258	0.78692	0.019025	0.20478	0.12313
	6.6546	0.51969	0.55128	0.83678	0.026356	0.20717	0.12231
	6.6713	0.54594	0.48393	0.84823	0.035184	0.21449	0.10968
	6.688	0.56048	0.45863	0.79656	0.032599	0.15698	0.069471
	6.7047	0.57932	0.49871	0.71767	0.038117	0.1207	0.046729
	6.7213	0.53291	0.53246	0.65913	0.06226	0.14592	0.066856
	6.738	0.46391	0.55109	0.67915	0.10177	0.15276	0.11741
	6.7547	0.48881	0.5246	0.76615	0.10153	0.14199	0.15149
	6.7714	0.51255	0.51003	0.79917	0.073622	0.14985	0.16047
	6.788	0.54605	0.47673	0.76406	0.082382	0.15815	0.15039
	6.8047	0.59715	0.44728	0.719	0.092336	0.17582	0.11491
	6.8214	0.61223	0.55671	0.68984	0.080573	0.16791	0.074161
	6.8381	0.60934	0.67007	0.6494	0.065473	0.15913	0.06241
	6.8548	0.56983	0.70136	0.66567	0.061081	0.14843	0.06649
	6.8714	0.54362	0.67478	0.76529	0.059411	0.12877	0.074788
	6.8881	0.59058	0.61073	0.77264	0.062872	0.12384	0.082497
	6.9048	0.6708	0.53741	0.70573	0.083259	0.097593	0.066023
	6.9215	0.71889	0.50389	0.71914	0.08115	0.063454	0.071683
	6.9382	0.70492	0.4924	0.7337	0.076087	0.087479	0.11103
	6.9548	0.67117	0.55117	0.72693	0.064182	0.11833	0.12435
	6.9715	0.62617	0.61597	0.731	0.059749	0.12194	0.095624
	6.9882	0.52218	0.57106	0.67114	0.04776	0.12656	0.067906
	7.0049	0.40924	0.49685	0.5638	0.039332	0.1202	0.080293
	7.0215	0.43062	0.44173	0.54339	0.060714	0.11331	0.090752
	7.0382	0.54746	0.49316	0.59123	0.077508	0.10374	0.079215
	7.0549	0.6444	0.53923	0.60623	0.084597	0.11074	0.080285
	7.0716	0.68505	0.49847	0.611	0.071543	0.1423	0.089407
	7.0883	0.62647	0.50929	0.59873	0.050814	0.1416	0.073885
	7.1049	0.53764	0.53159	0.56165	0.053392	0.096716	0.076203
	7.1216	0.5426	0.48962	0.57396	0.067358	0.073122	0.1113
	7.1383	0.59394	0.42571	0.57367	0.06434	0.07278	0.11284
	7.155	0.57275	0.44715	0.51179	0.045643	0.061476	0.08806
	7.1716	0.49784	0.50066	0.54646	0.047448	0.050199	0.096486
	7.1883	0.42566	0.47946	0.6092	0.054814	0.05756	0.10614
	7.205	0.42641	0.46871	0.58604	0.036579	0.056335	0.092724
	7.2217	0.5109	0.49325	0.56193	0.02103	0.03652	0.081767
	7.2384	0.53177	0.53328	0.58624	0.022798	0.017003	0.068582
	7.255	0.49668	0.5575	0.57279	0.024318	0.025351	0.058957
	7.2717	0.53476	0.56709	0.52909	0.030132	0.046538	0.060591
	7.2884	0.57199	0.48988	0.4548	0.024671	0.050787	0.063917
	7.3051	0.54003	0.40113	0.40504	0.0083908	0.055773	0.05837
	7.3218	0.52346	0.38804	0.4537	0.0065079	0.06967	0.053243
	7.3384	0.5458	0.40306	0.56534	0.023946	0.093519	0.038362
	7.3551	0.54304	0.39842	0.57677	0.037341	0.076648	0.012548
	7.3718	0.5518	0.35683	0.48857	0.026954	0.052584	0.0076009
	7.3885	0.48817	0.32895	0.40349	0.015465	0.051028	0.025085
	7.4051	0.44402	0.37165	0.43793	0.019604	0.053542	0.042728
	7.4218	0.43914	0.44456	0.48834	0.034754	0.057278	0.057731
	7.4385	0.42979	0.45755	0.44318	0.057215	0.079867	0.060681
	7.4552	0.46351	0.44313	0.40232	0.068039	0.09287	0.054464
	7.4719	0.46125	0.42772	0.41719	0.057596	0.10548	0.058691
	7.4885	0.43626	0.40344	0.42598	0.051567	0.12846	0.068579
	7.5052	0.44186	0.36872	0.49708	0.05406	0.13124	0.086264
	7.5219	0.44276	0.34666	0.51698	0.051102	0.095706	0.088268
	7.5386	0.49516	0.36347	0.43536	0.0338	0.069873	0.10084
	7.5552	0.54012	0.42987	0.39875	0.012894	0.069399	0.10245
	7.5719	0.55868	0.44591	0.40664	0.016621	0.064516	0.083647
	7.5886	0.47799	0.38679	0.42599	0.044827	0.070154	0.057918
	7.6053	0.39915	0.33852	0.40374	0.059991	0.069842	0.044168
	7.622	0.40512	0.3633	0.36865	0.063842	0.060855	0.068183
	7.6386	0.46852	0.40115	0.36682	0.077025	0.073281	0.081442
	7.6553	0.53837	0.44706	0.32074	0.079445	0.10122	0.052373
	7.672	0.56195	0.49805	0.34015	0.079433	0.097393	0.037385
	7.6887	0.5256	0.49274	0.4234	0.092141	0.06617	0.046694
	7.7054	0.45105	0.44494	0.41775	0.08721	0.050478	0.055595
	7.722	0.37217	0.44507	0.37047	0.071271	0.061835	0.053813
	7.7387	0.3549	0.45481	0.38108	0.054592	0.10617	0.040791
	7.7554	0.40774	0.44206	0.41187	0.042164	0.13978	0.043669
	7.7721	0.4502	0.43643	0.4157	0.050853	0.13007	0.054394
	7.7887	0.4779	0.43159	0.38014	0.046589	0.11814	0.056915
	7.8054	0.48985	0.41893	0.34587	0.042957	0.13451	0.064616
	7.8221	0.45206	0.38996	0.3831	0.069492	0.14325	0.064816
	7.8388	0.37266	0.35861	0.41069	0.076919	0.13346	0.053199
	7.8555	0.31569	0.35332	0.40994	0.064449	0.12548	0.041547
	7.8721	0.27526	0.36985	0.44484	0.044836	0.10437	0.029559
	7.8888	0.24786	0.3878	0.47401	0.035523	0.080212	0.023124
	7.9055	0.24643	0.35746	0.46964	0.037302	0.07909	0.025588
	7.9222	0.28873	0.2984	0.38436	0.04358	0.084581	0.02885
	7.9388	0.32677	0.29203	0.31616	0.048193	0.11125	0.040134
	7.9555	0.35564	0.32926	0.32597	0.048781	0.11842	0.050766
	7.9722	0.43457	0.40155	0.35611	0.070299	0.10476	0.053353
	7.9889	0.48603	0.4557	0.35965	0.084315	0.149	0.056851
	8.0056	0.48707	0.45693	0.31808	0.077472	0.18097	0.05632
	8.0222	0.51064	0.38873	0.31304	0.066223	0.1696	0.054453
	8.0389	0.50998	0.30736	0.34439	0.051963	0.13162	0.058827
	8.0556	0.4593	0.30243	0.38736	0.052516	0.1202	0.06998
	8.0723	0.36424	0.31001	0.38481	0.055695	0.13463	0.087087
	8.089	0.32732	0.30459	0.34286	0.067287	0.10473	0.08705
	8.1056	0.33322	0.33109	0.33562	0.074337	0.09559	0.090517
	8.1223	0.34318	0.35739	0.34524	0.064677	0.12649	0.094526
	8.139	0.34752	0.31957	0.28887	0.057676	0.13939	0.084225
	8.1557	0.35211	0.30838	0.28275	0.05053	0.13886	0.062339
	8.1723	0.41098	0.39083	0.36128	0.049842	0.1243	0.059156
	8.189	0.46404	0.41536	0.40113	0.050213	0.10532	0.057761
	8.2057	0.48684	0.35788	0.39491	0.031407	0.082605	0.045228
	8.2224	0.48091	0.35663	0.40559	0.016033	0.0855	0.046457
	8.2391	0.5375	0.37618	0.38292	0.014264	0.12309	0.039542
	8.2557	0.60625	0.36362	0.32447	0.025431	0.15079	0.017479
	8.2724	0.51282	0.30022	0.25817	0.038843	0.15804	0.01198
	8.2891	0.365	0.29607	0.23439	0.035066	0.14872	0.028519
	8.3058	0.29576	0.32332	0.23874	0.029967	0.12777	0.036606
	8.3224	0.29626	0.37805	0.26442	0.0336	0.11795	0.03167
	8.3391	0.29778	0.37624	0.29833	0.054426	0.13368	0.030701
	8.3558	0.28699	0.29583	0.27223	0.069223	0.15036	0.026009
	8.3725	0.27796	0.32483	0.25005	0.056248	0.12074	0.010153
	8.3892	0.2916	0.37203	0.29029	0.0469	0.090862	0.0013057
	8.4058	0.3	0.35423	0.35557	0.040934	0.091006	2.2201e-05
	8.4225	0.28807	0.36065	0.36796	0.051367	0.095266	0.00024208
	8.4392	0.34047	0.35583	0.32053	0.071605	0.10436	0.0034261
	8.4559	0.42311	0.29987	0.27352	0.080277	0.11774	0.014837
	8.4726	0.50214	0.29303	0.2638	0.091919	0.11138	0.027275
	8.4892	0.55695	0.29935	0.27572	0.098361	0.093471	0.024576
	8.5059	0.56025	0.22981	0.29359	0.076301	0.080298	0.018057
	8.5226	0.46594	0.17342	0.37035	0.061028	0.070682	0.026604
	8.5393	0.4279	0.22396	0.41732	0.055226	0.064786	0.038545
	8.5559	0.45236	0.31204	0.3956	0.049015	0.059557	0.032027
	8.5726	0.38544	0.33551	0.3375	0.060887	0.043411	0.012506
	8.5893	0.28002	0.33717	0.27943	0.054888	0.043058	0.0018439
	8.606	0.23548	0.34393	0.28785	0.046526	0.060977	0.00075212
	8.6227	0.24004	0.33294	0.3064	0.054455	0.086086	0.0057572
	8.6393	0.22327	0.2804	0.29628	0.073102	0.084125	0.016387
	8.656	0.25014	0.24286	0.27735	0.091023	0.06594	0.027258
	8.6727	0.29702	0.24319	0.30288	0.088185	0.071765	0.040108
	8.6894	0.27478	0.2806	0.30681	0.063312	0.070219	0.038755
	8.706	0.24164	0.32131	0.2537	0.053315	0.072621	0.018897
	8.7227	0.29713	0.32574	0.22641	0.052762	0.064679	0.0097151
	8.7394	0.37334	0.31756	0.23083	0.045363	0.05155	0.011405
	8.7561	0.3878	0.27613	0.21352	0.050734	0.073195	0.0053374
	8.7728	0.36551	0.23228	0.23542	0.062291	0.088281	0.00082016
	8.7894	0.37013	0.27426	0.25063	0.059715	0.065807	0.0022616
	8.8061	0.34266	0.30104	0.22245	0.045219	0.064533	0.0091315
	8.8228	0.26431	0.25246	0.20947	0.044128	0.061487	0.01126
	8.8395	0.2038	0.20982	0.22553	0.058491	0.050258	0.011313
	8.8562	0.20629	0.22912	0.2205	0.06184	0.070505	0.019418
	8.8728	0.24593	0.2634	0.19431	0.045903	0.10285	0.016281
	8.8895	0.29932	0.30408	0.16566	0.052519	0.12459	0.0069106
	8.9062	0.3653	0.33532	0.17958	0.093239	0.13104	0.014649
	8.9229	0.40162	0.30512	0.24556	0.10195	0.13258	0.034761
	8.9395	0.4123	0.31369	0.27218	0.087535	0.14541	0.048889
	8.9562	0.44878	0.35388	0.25842	0.063129	0.15428	0.067697
	8.9729	0.41086	0.36055	0.26542	0.066843	0.12204	0.059583
	8.9896	0.36123	0.34074	0.25082	0.10133	0.093381	0.047163
	9.0063	0.35742	0.33413	0.2423	0.10886	0.13533	0.04466
	9.0229	0.45454	0.32512	0.26181	0.10554	0.16895	0.036373
	9.0396	0.54706	0.28842	0.25957	0.11232	0.15455	0.043719
	9.0563	0.44043	0.24826	0.22388	0.093905	0.12053	0.046282
	9.073	0.30545	0.27655	0.19442	0.057433	0.10265	0.025007
	9.0896	0.28119	0.28567	0.21347	0.049901	0.10933	0.015904
	9.1063	0.28729	0.26396	0.27426	0.064438	0.12083	0.029189
	9.123	0.26501	0.2726	0.33009	0.07705	0.14371	0.039285
	9.1397	0.25329	0.24627	0.34221	0.068151	0.17619	0.04353
	9.1564	0.27988	0.22226	0.28625	0.048157	0.21692	0.047403
	9.173	0.29448	0.26316	0.22543	0.075552	0.23645	0.046039
	9.1897	0.27777	0.29272	0.20248	0.13791	0.18546	0.031679
	9.2064	0.26766	0.32434	0.27591	0.17983	0.12674	0.027499
	9.2231	0.26512	0.33282	0.31867	0.16314	0.1397	0.032322
	9.2397	0.28017	0.28495	0.27196	0.13907	0.18344	0.027988
	9.2564	0.29982	0.20817	0.22089	0.11273	0.2077	0.038979
	9.2731	0.31703	0.22589	0.1821	0.068143	0.20732	0.060156
	9.2898	0.3015	0.27907	0.19895	0.041106	0.18024	0.088178
	9.3065	0.29364	0.26601	0.21487	0.032077	0.16088	0.095971
	9.3231	0.29585	0.26754	0.20701	0.051008	0.12756	0.083776
	9.3398	0.27271	0.29816	0.19561	0.059545	0.11969	0.068717
	9.3565	0.27703	0.30151	0.17026	0.050402	0.15937	0.063249
	9.3732	0.30762	0.27903	0.15241	0.037632	0.17153	0.066132
	9.3899	0.30173	0.27836	0.15358	0.031673	0.16186	0.064276
	9.4065	0.29172	0.28295	0.17185	0.051933	0.15337	0.070622
	9.4232	0.31873	0.27857	0.21309	0.062944	0.13968	0.089998
	9.4399	0.34515	0.26565	0.21449	0.045795	0.12062	0.091922
	9.4566	0.36308	0.25576	0.20824	0.034835	0.13449	0.073273
	9.4732	0.3902	0.25815	0.21253	0.035037	0.17805	0.066059
	9.4899	0.37484	0.26106	0.22238	0.052799	0.20519	0.049938
	9.5066	0.27876	0.27769	0.24707	0.084323	0.17599	0.023503
	9.5233	0.22437	0.30407	0.28419	0.078773	0.094179	0.033073
	9.54	0.20239	0.26276	0.3155	0.048761	0.068545	0.073348
	9.5566	0.16793	0.17559	0.29169	0.06755	0.10648	0.094862
	9.5733	0.17231	0.17103	0.23076	0.089824	0.15357	0.084135
	9.59	0.21289	0.2381	0.20187	0.083122	0.14233	0.05602
	9.6067	0.20133	0.2734	0.18277	0.055269	0.1054	0.024303
	9.6233	0.18208	0.27295	0.17853	0.037218	0.10757	0.011776
	9.64	0.1833	0.27432	0.17899	0.021859	0.11265	0.019714
	9.6567	0.20763	0.26332	0.22292	0.01321	0.11644	0.03397
	9.6734	0.20629	0.24528	0.26996	0.01307	0.12031	0.060189
	9.6901	0.19204	0.28954	0.21539	0.018788	0.12575	0.056579
	9.7067	0.20894	0.30991	0.18751	0.03695	0.14344	0.021333
	9.7234	0.19234	0.26859	0.20037	0.04613	0.14514	0.018624
	9.7401	0.17879	0.25294	0.20135	0.039734	0.1049	0.040639
	9.7568	0.23586	0.27986	0.23723	0.026816	0.074692	0.045383
	9.7735	0.32993	0.30043	0.32041	0.018207	0.069699	0.046878
	9.7901	0.47392	0.28509	0.37359	0.033441	0.064866	0.05861
	9.8068	0.52196	0.31886	0.38901	0.051825	0.075626	0.053115
	9.8235	0.39566	0.34357	0.36811	0.065829	0.11007	0.064877
	9.8402	0.28801	0.29822	0.30533	0.075435	0.1144	0.080215
	9.8568	0.25337	0.23334	0.23926	0.094663	0.080881	0.068607
	9.8735	0.26238	0.23067	0.20934	0.08683	0.04876	0.046951
	9.8902	0.29339	0.27029	0.18624	0.082026	0.049386	0.034917
	9.9069	0.27292	0.29117	0.17866	0.10347	0.077296	0.034344
	9.9236	0.20129	0.25307	0.17992	0.083375	0.11146	0.044448
	9.9402	0.20072	0.23841	0.18371	0.047778	0.14193	0.072223
	9.9569	0.28783	0.23613	0.21993	0.03843	0.18175	0.076052
	9.9736	0.34331	0.19348	0.30989	0.03427	0.16344	0.041513
	9.9903	0.3389	0.17108	0.34051	0.039469	0.13531	0.034248
	10.0069	0.33227	0.19631	0.33822	0.049516	0.15623	0.045544
	10.0236	0.35646	0.20512	0.34181	0.039104	0.19126	0.055049
	10.0403	0.34582	0.18912	0.29131	0.030825	0.2153	0.054097
	10.057	0.28771	0.20108	0.27981	0.026158	0.15156	0.034001
	10.0737	0.19812	0.21076	0.29781	0.032704	0.080089	0.033102
	10.0903	0.15094	0.19168	0.2813	0.055774	0.083186	0.053944
	10.107	0.15411	0.18964	0.27073	0.075801	0.12524	0.065964
	10.1237	0.17917	0.20536	0.28118	0.096253	0.1901	0.051454
	10.1404	0.27076	0.23417	0.3089	0.13001	0.19812	0.038924
	10.1571	0.35534	0.29466	0.30283	0.13862	0.18842	0.045065
	10.1737	0.36269	0.29391	0.25391	0.10376	0.19805	0.070351
	10.1904	0.38051	0.26134	0.24905	0.057465	0.18584	0.071213
	10.2071	0.35913	0.27463	0.29713	0.027552	0.18059	0.056357
	10.2238	0.3294	0.29305	0.30854	0.04411	0.18441	0.071817
	10.2404	0.37932	0.3044	0.2875	0.06433	0.18582	0.081163
	10.2571	0.36887	0.29313	0.25725	0.067995	0.21447	0.070144
	10.2738	0.27281	0.27528	0.23752	0.068029	0.18636	0.085429
	10.2905	0.21272	0.26073	0.2278	0.040373	0.12831	0.097655
	10.3072	0.21777	0.22587	0.21712	0.034266	0.15421	0.087497
	10.3238	0.2075	0.17449	0.21141	0.06553	0.2105	0.084941
	10.3405	0.16969	0.16769	0.1832	0.079141	0.20904	0.062334
	10.3572	0.15609	0.20243	0.16011	0.058125	0.15053	0.037293
	10.3739	0.15827	0.2432	0.14155	0.04403	0.082086	0.036278
	10.3905	0.22675	0.22545	0.13577	0.059137	0.057044	0.049629
	10.4072	0.30181	0.15068	0.16462	0.064287	0.07	0.053901
	10.4239	0.2635	0.11881	0.18168	0.068585	0.10297	0.039106
	10.4406	0.1891	0.16925	0.16358	0.069126	0.13152	0.034373
	10.4573	0.15781	0.20983	0.1729	0.047146	0.1296	0.037761
	10.4739	0.16025	0.2345	0.18658	0.028234	0.099284	0.036382
	10.4906	0.20686	0.24962	0.17444	0.038437	0.10836	0.028736
	10.5073	0.23554	0.22646	0.1964	0.054071	0.1348	0.041489
	10.524	0.22376	0.19076	0.19166	0.09628	0.13792	0.051488
	10.5407	0.20364	0.18968	0.16539	0.12037	0.15894	0.036427
	10.5573	0.18299	0.22332	0.16673	0.085935	0.1844	0.024156
	10.574	0.17254	0.27699	0.18988	0.038763	0.21166	0.030173
	10.5907	0.18266	0.31976	0.17996	0.025336	0.22143	0.030363
	10.6074	0.20737	0.34104	0.17634	0.030408	0.20058	0.039184
	10.624	0.18068	0.34312	0.16366	0.017414	0.14838	0.078532
	10.6407	0.15558	0.33202	0.10195	0.0038063	0.098304	0.091894
	10.6574	0.19408	0.33606	0.09158	0.0014578	0.081399	0.0747
	10.6741	0.21694	0.33692	0.13513	0.010178	0.06853	0.050812
	10.6908	0.22599	0.29936	0.16829	0.03155	0.076022	0.029747
	10.7074	0.22752	0.24724	0.14675	0.052744	0.10147	0.048377
	10.7241	0.20534	0.20646	0.10102	0.071625	0.094303	0.068036
	10.7408	0.16717	0.14086	0.064259	0.076558	0.092526	0.055035
	10.7575	0.13128	0.12616	0.053666	0.074986	0.10834	0.038939
	10.7741	0.10039	0.13918	0.058182	0.068058	0.10408	0.045452
	10.7908	0.091667	0.14002	0.066013	0.045652	0.10567	0.051548
	10.8075	0.11103	0.12748	0.089609	0.029006	0.11815	0.066783
	10.8242	0.13342	0.13612	0.092817	0.016702	0.1125	0.094273
	10.8409	0.14466	0.15953	0.089957	0.027022	0.096633	0.10235
	10.8575	0.16554	0.1505	0.10502	0.040254	0.07352	0.10508
	10.8742	0.17581	0.15255	0.093238	0.023498	0.06354	0.098743
	10.8909	0.15118	0.16524	0.082514	0.0055088	0.07849	0.072608
	10.9076	0.1651	0.19854	0.091009	0.00066188	0.10125	0.061238
	10.9243	0.18615	0.23563	0.11116	0.0031222	0.11759	0.071631
	10.9409	0.17242	0.22717	0.13621	0.010135	0.15065	0.068178
	10.9576	0.14406	0.19231	0.14114	0.0097995	0.1725	0.059759
	10.9743	0.12302	0.17374	0.14992	0.0094215	0.17434	0.04965
	10.991	0.10715	0.14847	0.15568	0.027384	0.15901	0.03703
	11.0076	0.10492	0.17722	0.16948	0.04949	0.11065	0.040994
	11.0243	0.15206	0.20559	0.17606	0.051837	0.094689	0.057067
	11.041	0.22747	0.18767	0.16428	0.05002	0.11165	0.063289
	11.0577	0.25853	0.17865	0.16157	0.047467	0.13052	0.063511
	11.0744	0.22831	0.16307	0.15539	0.054609	0.14841	0.0766
	11.091	0.18051	0.1745	0.1647	0.050633	0.13623	0.10214
	11.1077	0.15227	0.21491	0.2066	0.02914	0.11983	0.11603
	11.1244	0.12588	0.19427	0.27085	0.022641	0.13177	0.091969
	11.1411	0.14479	0.1757	0.26407	0.037682	0.13856	0.076256
	11.1577	0.19206	0.17777	0.20189	0.059616	0.13368	0.10174
	11.1744	0.2217	0.18344	0.15802	0.063896	0.11427	0.1149
	11.1911	0.22936	0.1941	0.13847	0.04965	0.088097	0.10143
	11.2078	0.217	0.17495	0.14697	0.046999	0.088978	0.096843
	11.2245	0.22965	0.14426	0.17623	0.056729	0.087591	0.068371
	11.2411	0.22095	0.13979	0.18721	0.08327	0.088418	0.036045
	11.2578	0.17138	0.14378	0.19663	0.090629	0.10913	0.017788
	11.2745	0.13072	0.15823	0.16627	0.062377	0.11151	0.02028
	11.2912	0.13035	0.17777	0.13406	0.040512	0.083856	0.031256
	11.3079	0.17499	0.22786	0.14777	0.029464	0.05479	0.034475
	11.3245	0.24773	0.26985	0.14631	0.030177	0.068281	0.03452
	11.3412	0.29326	0.23586	0.10714	0.036548	0.10259	0.03243
	11.3579	0.34256	0.22722	0.14487	0.04223	0.11551	0.043043
	11.3746	0.43218	0.28614	0.32302	0.035105	0.12839	0.054532
	11.3912	0.45097	0.31634	0.45538	0.024231	0.16102	0.054673
	11.4079	0.38915	0.31	0.39406	0.045198	0.15712	0.067679
	11.4246	0.35456	0.26516	0.30521	0.078618	0.14153	0.060329
	11.4413	0.32705	0.21991	0.27286	0.08236	0.16215	0.032986
	11.458	0.2672	0.23407	0.291	0.074816	0.18496	0.030115
	11.4746	0.2225	0.21553	0.30892	0.079015	0.21028	0.051391
	11.4913	0.21102	0.18099	0.29132	0.082909	0.22009	0.059143
	11.508	0.21622	0.20181	0.24911	0.07651	0.22348	0.043937
	11.5247	0.2108	0.22936	0.21591	0.088725	0.26127	0.038142
	11.5413	0.1745	0.25185	0.22594	0.10849	0.25447	0.051503
	11.558	0.16113	0.25042	0.2443	0.10464	0.21403	0.047745
	11.5747	0.17893	0.23376	0.25677	0.084023	0.1864	0.048678
	11.5914	0.17945	0.22564	0.24371	0.076888	0.18929	0.062573
	11.6081	0.11887	0.22228	0.18727	0.063093	0.19454	0.077483
	11.6247	0.079106	0.24093	0.15912	0.044116	0.19149	0.057446
	11.6414	0.091169	0.24652	0.19063	0.037506	0.21545	0.037327
	11.6581	0.10459	0.20633	0.19157	0.030963	0.21601	0.049656
	11.6748	0.12512	0.18621	0.13621	0.038071	0.18825	0.051692
	11.6915	0.10325	0.17974	0.091912	0.039325	0.20789	0.040924
	11.7081	0.065788	0.15728	0.083083	0.029882	0.22832	0.038994
	11.7248	0.067257	0.11415	0.10705	0.036568	0.22113	0.048899
	11.7415	0.091588	0.10196	0.13293	0.062536	0.21687	0.045858
	11.7582	0.097919	0.15141	0.095437	0.072762	0.16772	0.035237
	11.7748	0.10788	0.1789	0.068725	0.071447	0.10639	0.026169
	11.7915	0.14714	0.17931	0.091222	0.059809	0.12201	0.022793
	11.8082	0.18917	0.1674	0.11338	0.035621	0.15123	0.012131
	11.8249	0.20623	0.11484	0.12245	0.035463	0.15624	0.0097385
	11.8416	0.20971	0.10244	0.1107	0.028126	0.14585	0.021093
	11.8582	0.22266	0.11148	0.09181	0.017849	0.14587	0.028053
	11.8749	0.2225	0.12125	0.069614	0.022614	0.16216	0.025135
	11.8916	0.2027	0.14073	0.053584	0.025565	0.17949	0.028812
	11.9083	0.18393	0.15749	0.065645	0.017744	0.15264	0.035508
	11.9249	0.16117	0.16183	0.10456	0.022062	0.11737	0.040083
	11.9416	0.14898	0.14109	0.14158	0.02989	0.11091	0.028136
	11.9583	0.15117	0.16507	0.16755	0.04312	0.10817	0.0098769
	11.975	0.15324	0.19098	0.17024	0.0664	0.11291	0.013879
	11.9917	0.12908	0.16136	0.132	0.084077	0.10308	0.037283
	12.0083	0.13328	0.14994	0.10525	0.097094	0.081897	0.039182
	12.025	0.15987	0.14037	0.096324	0.10348	0.094884	0.028064
	12.0417	0.17138	0.1137	0.080486	0.071912	0.10978	0.031236
	12.0584	0.1624	0.083923	0.092526	0.032894	0.094978	0.035522
	12.0751	0.15124	0.074953	0.13639	0.027596	0.079786	0.044549
	12.0917	0.16844	0.077517	0.16092	0.039295	0.092049	0.05323
	12.1084	0.19392	0.055945	0.16725	0.056248	0.10492	0.037608
	12.1251	0.26025	0.069778	0.1894	0.066016	0.091276	0.01943
	12.1418	0.36084	0.14965	0.19743	0.069036	0.10935	0.013744
	12.1584	0.36626	0.21608	0.19186	0.072632	0.14295	0.012855
	12.1751	0.30686	0.26267	0.21596	0.060352	0.13118	0.0073633
	12.1918	0.2691	0.3041	0.23272	0.035977	0.12037	0.0064009
	12.2085	0.2897	0.29954	0.2469	0.025758	0.1313	0.011298
	12.2252	0.26987	0.26693	0.27064	0.030238	0.15852	0.006673
	12.2418	0.23083	0.24797	0.28042	0.027603	0.16116	0.0030629
	12.2585	0.22578	0.26726	0.25449	0.02776	0.13802	0.012079
	12.2752	0.22639	0.28054	0.20795	0.040334	0.12965	0.022006
	12.2919	0.24458	0.26879	0.16612	0.049382	0.12701	0.015999
	12.3085	0.25145	0.26479	0.14274	0.080808	0.12933	0.019733
	12.3252	0.21837	0.25754	0.16943	0.10642	0.1571	0.029578
	12.3419	0.20173	0.266	0.22699	0.094043	0.15261	0.020201
	12.3586	0.21603	0.28623	0.23102	0.073698	0.12859	0.013188
	12.3753	0.26245	0.29259	0.20285	0.075014	0.12154	0.020649
	12.3919	0.27437	0.29801	0.17491	0.083935	0.10995	0.016207
	12.4086	0.22445	0.30332	0.17938	0.083646	0.12421	0.012091
	12.4253	0.21891	0.3037	0.18154	0.076133	0.15858	0.03438
	12.442	0.21972	0.28548	0.1694	0.063375	0.16099	0.070073
	12.4587	0.18736	0.22728	0.20296	0.060046	0.16334	0.088835
	12.4753	0.18569	0.23044	0.25467	0.068779	0.1845	0.082527
	12.492	0.23705	0.28252	0.30257	0.10237	0.20326	0.084699
	12.5087	0.299	0.27758	0.33198	0.11304	0.18868	0.089712
	12.5254	0.33584	0.27783	0.31871	0.11313	0.16649	0.068481
	12.542	0.33231	0.29393	0.29516	0.12907	0.19359	0.049191
	12.5587	0.28882	0.34552	0.26703	0.1089	0.21711	0.064221
	12.5754	0.22419	0.36769	0.25377	0.086521	0.22534	0.10931
	12.5921	0.18699	0.33158	0.23914	0.11759	0.24067	0.127
	12.6088	0.17712	0.30738	0.21009	0.12488	0.25119	0.11419
	12.6254	0.17671	0.2462	0.20309	0.094591	0.21769	0.08711
	12.6421	0.2145	0.18744	0.21378	0.095995	0.16191	0.083038
	12.6588	0.23365	0.21399	0.20208	0.11868	0.17466	0.096237
	12.6755	0.242	0.20019	0.18269	0.1212	0.19497	0.09094
	12.6921	0.28286	0.13899	0.18668	0.098242	0.16336	0.078136
	12.7088	0.31466	0.12907	0.22646	0.098751	0.18914	0.08981
	12.7255	0.32749	0.15788	0.24698	0.13071	0.22717	0.1018
	12.7422	0.3305	0.2159	0.22947	0.12947	0.20909	0.10566
	12.7589	0.33634	0.23251	0.20973	0.099645	0.19078	0.099076
	12.7755	0.35365	0.21479	0.19314	0.08507	0.21264	0.081261
	12.7922	0.34157	0.18295	0.19166	0.090768	0.24292	0.085388
	12.8089	0.26941	0.12992	0.19012	0.077094	0.20814	0.096067
	12.8256	0.20908	0.15657	0.21297	0.079345	0.20172	0.070748
	12.8423	0.19721	0.24854	0.22823	0.084989	0.22794	0.039491
	12.8589	0.18998	0.26103	0.20264	0.045967	0.23435	0.0386
	12.8756	0.22877	0.19984	0.19145	0.028111	0.24684	0.048894
	12.8923	0.2291	0.18784	0.18231	0.033936	0.2663	0.059943
	12.909	0.18451	0.18702	0.17133	0.035446	0.26276	0.066326
	12.9256	0.19545	0.17234	0.17795	0.052994	0.22918	0.068767
	12.9423	0.23582	0.19283	0.18133	0.044495	0.21486	0.10163
	12.959	0.24358	0.24219	0.16156	0.029477	0.19329	0.13249
	12.9757	0.24964	0.27978	0.13147	0.033901	0.18008	0.1017
	12.9924	0.24226	0.28481	0.11503	0.032468	0.18195	0.086839
	13.009	0.2212	0.27139	0.11524	0.049557	0.1627	0.10931
	13.0257	0.21651	0.26468	0.11933	0.069035	0.14687	0.094469
	13.0424	0.23258	0.25999	0.13743	0.089141	0.1509	0.084528
	13.0591	0.25807	0.27471	0.16871	0.10741	0.18126	0.097115
	13.0757	0.28924	0.26258	0.17402	0.096062	0.18081	0.10889
	13.0924	0.29006	0.21607	0.15313	0.060633	0.15403	0.12304
	13.1091	0.23351	0.20172	0.12251	0.038234	0.11379	0.13413
	13.1258	0.17441	0.21421	0.1131	0.03112	0.078414	0.13419
	13.1425	0.14354	0.23688	0.14914	0.034168	0.078075	0.089809
	13.1591	0.13308	0.2324	0.1732	0.039384	0.075249	0.04849
	13.1758	0.16528	0.21005	0.14483	0.022388	0.069273	0.04821
	13.1925	0.19243	0.18496	0.1405	0.013095	0.093318	0.057921
	13.2092	0.14688	0.17297	0.16396	0.0091711	0.13373	0.049148
	13.2259	0.077121	0.17597	0.146	0.0022616	0.19971	0.062795
	13.2425	0.057357	0.17395	0.12047	0.0002598	0.20785	0.083042
	13.2592	0.063819	0.15373	0.12642	0.0023234	0.17498	0.079019
	13.2759	0.076423	0.17404	0.1247	0.011109	0.16409	0.064783
	13.2926	0.080128	0.21674	0.11721	0.022882	0.1631	0.049578
	13.3092	0.076009	0.20673	0.12458	0.030705	0.17666	0.049838
	13.3259	0.10221	0.17691	0.14052	0.030722	0.16667	0.064638
	13.3426	0.16343	0.20595	0.15422	0.04467	0.1585	0.061911
	13.3593	0.2747	0.23784	0.1433	0.083151	0.1463	0.043433
	13.376	0.38841	0.28956	0.1452	0.093652	0.14798	0.051648
	13.3926	0.41937	0.38655	0.18548	0.05866	0.17936	0.051767
	13.4093	0.38892	0.42722	0.2077	0.038548	0.18904	0.026156
	13.426	0.35919	0.42389	0.18928	0.040875	0.2128	0.0099229
	13.4427	0.34108	0.38343	0.15925	0.050849	0.23452	0.011346
	13.4593	0.28462	0.31453	0.1656	0.049226	0.24204	0.0090938
	13.476	0.23257	0.28474	0.18964	0.032139	0.22912	0.010452
	13.4927	0.29504	0.22023	0.16986	0.027735	0.22326	0.021199
	13.5094	0.38232	0.15678	0.15804	0.042634	0.22018	0.024316
	13.5261	0.32332	0.1449	0.16068	0.040301	0.23565	0.042481
	13.5427	0.23879	0.13082	0.15684	0.027616	0.2376	0.078495
	13.5594	0.24382	0.1018	0.11668	0.018136	0.1708	0.077645
	13.5761	0.27729	0.089706	0.07569	0.016113	0.13363	0.048053
	13.5928	0.29098	0.12637	0.079799	0.03596	0.15411	0.046515
	13.6095	0.28572	0.15528	0.10309	0.055399	0.16864	0.059258
	13.6261	0.2476	0.14538	0.099352	0.051541	0.15854	0.058544
	13.6428	0.20526	0.12441	0.10717	0.037313	0.13339	0.050982
	13.6595	0.18995	0.12549	0.17094	0.027507	0.097316	0.051124
	13.6762	0.20096	0.1183	0.20936	0.028062	0.08986	0.05293
	13.6928	0.22146	0.10424	0.18088	0.032392	0.098361	0.048637
	13.7095	0.20419	0.10975	0.14423	0.016857	0.094968	0.02928
	13.7262	0.17475	0.12895	0.12575	0.0044763	0.10105	0.02982
	13.7429	0.19124	0.12499	0.1638	0.01169	0.12766	0.051686
	13.7596	0.20361	0.10803	0.24989	0.036191	0.15362	0.046518
	13.7762	0.19074	0.11772	0.28428	0.07146	0.15307	0.037019
	13.7929	0.21592	0.11993	0.26925	0.093974	0.16654	0.035512
	13.8096	0.23385	0.11997	0.27535	0.080113	0.17352	0.021594
	13.8263	0.20508	0.13003	0.26783	0.053204	0.15355	0.014223
	13.8429	0.23333	0.12974	0.21088	0.042867	0.14172	0.023519
	13.8596	0.2993	0.14883	0.17183	0.036826	0.15761	0.026577
	13.8763	0.31435	0.1654	0.1998	0.027654	0.15805	0.033211
	13.893	0.32505	0.18534	0.20868	0.044393	0.11173	0.045916
	13.9097	0.35897	0.19955	0.1595	0.075546	0.11053	0.072262
	13.9263	0.30659	0.16635	0.088977	0.080575	0.14774	0.103
	13.943	0.25579	0.15085	0.048632	0.060955	0.11752	0.10114
	13.9597	0.25137	0.17174	0.036494	0.048359	0.078788	0.093926
	13.9764	0.20648	0.18109	0.070766	0.044868	0.089731	0.10503
	13.9931	0.1747	0.18744	0.12112	0.030336	0.15047	0.10368
	14.0097	0.17789	0.15392	0.14274	0.014862	0.20619	0.10615
	14.0264	0.18115	0.10903	0.14536	0.030253	0.19336	0.087644
	14.0431	0.17448	0.093201	0.12937	0.050943	0.19574	0.061079
	14.0598	0.14752	0.11274	0.10669	0.041227	0.19844	0.03738
	14.0764	0.11213	0.1469	0.11699	0.02644	0.18196	0.020784
	14.0931	0.093971	0.16719	0.12311	0.016278	0.17667	0.031472
	14.1098	0.094228	0.18803	0.092631	0.0099138	0.17782	0.049326
	14.1265	0.074059	0.21126	0.074745	0.012177	0.18102	0.057392
	14.1432	0.072924	0.21279	0.068235	0.012959	0.16196	0.051557
	14.1598	0.088988	0.19631	0.064339	0.027888	0.16195	0.035363
	14.1765	0.091575	0.20272	0.089115	0.048823	0.17155	0.062227
	14.1932	0.090379	0.21309	0.13584	0.048808	0.13687	0.10614
	14.2099	0.1122	0.19383	0.14132	0.0409	0.11634	0.094808
	14.2265	0.13352	0.17838	0.11542	0.039289	0.13261	0.084224
	14.2432	0.11777	0.18976	0.085738	0.039088	0.13369	0.09738
	14.2599	0.094225	0.20942	0.085214	0.037036	0.12548	0.11348
	14.2766	0.083518	0.21479	0.11449	0.052388	0.13391	0.10538
	14.2933	0.087041	0.22214	0.16608	0.063002	0.15813	0.079835
	14.3099	0.10128	0.24363	0.1965	0.036947	0.17208	0.059677
	14.3266	0.14808	0.25153	0.23369	0.011995	0.17812	0.074442
	14.3433	0.21982	0.25915	0.28678	0.015838	0.1648	0.10488
	14.36	0.24615	0.28689	0.28403	0.030677	0.14686	0.097564
	14.3767	0.20133	0.30251	0.2521	0.050376	0.15629	0.059195
	14.3933	0.16456	0.29799	0.26503	0.077638	0.16862	0.048708
	14.41	0.14814	0.27516	0.24082	0.077821	0.15841	0.048204
	14.4267	0.17058	0.24638	0.18467	0.081841	0.14278	0.052483
	14.4434	0.22064	0.25224	0.15636	0.081664	0.10261	0.053479
	14.46	0.23524	0.30588	0.16474	0.070495	0.085967	0.039541
	14.4767	0.24041	0.30591	0.20435	0.077057	0.076461	0.028689
	14.4934	0.25981	0.24601	0.22595	0.083261	0.051888	0.036267
	14.5101	0.27305	0.21971	0.22519	0.063937	0.047641	0.056334
	14.5268	0.2542	0.23857	0.21881	0.039475	0.079159	0.082621
	14.5434	0.19498	0.19624	0.19551	0.021351	0.1174	0.089006
	14.5601	0.14417	0.13843	0.16827	0.013103	0.13128	0.072722
	14.5768	0.12538	0.18076	0.19036	0.012718	0.1193	0.045034
	14.5935	0.1345	0.24252	0.217	0.014913	0.11113	0.023476
	14.6101	0.15115	0.24423	0.19348	0.023795	0.12338	0.01808
	14.6268	0.17428	0.1915	0.17513	0.027464	0.14405	0.027375
	14.6435	0.18469	0.1463	0.17385	0.026985	0.1564	0.046618
	14.6602	0.18726	0.16722	0.16152	0.023424	0.17005	0.062165
	14.6769	0.21078	0.18698	0.161	0.013053	0.17358	0.0689
	14.6935	0.23204	0.18192	0.2107	0.023493	0.13809	0.067025
	14.7102	0.243	0.19061	0.24078	0.037259	0.12601	0.044781
	14.7269	0.20889	0.21239	0.21321	0.039575	0.14213	0.033507
	14.7436	0.15747	0.21677	0.19752	0.048604	0.14954	0.041495
	14.7603	0.12108	0.21542	0.18979	0.049831	0.13769	0.03955
	14.7769	0.11552	0.23847	0.18052	0.049639	0.128	0.02248
	14.7936	0.14846	0.282	0.18762	0.052209	0.11182	0.016139
	14.8103	0.20275	0.30252	0.25102	0.048206	0.10385	0.038125
	14.827	0.26598	0.29291	0.3786	0.047174	0.11053	0.064419
	14.8436	0.32316	0.27525	0.38832	0.063451	0.12889	0.098516
	14.8603	0.35355	0.28154	0.30484	0.079814	0.15001	0.10587
	14.877	0.32051	0.26956	0.25864	0.10474	0.16593	0.073875
	14.8937	0.21456	0.26712	0.24133	0.11088	0.18029	0.064215
	14.9104	0.16454	0.27412	0.23086	0.084573	0.16064	0.063005
	14.927	0.22097	0.25516	0.2205	0.066728	0.12292	0.064633
	14.9437	0.32658	0.20657	0.23059	0.069524	0.12641	0.092266
	14.9604	0.40022	0.21356	0.30205	0.082656	0.12622	0.14047
	14.9771	0.45212	0.30066	0.38795	0.077683	0.15011	0.16896
	14.9937	0.45962	0.3298	0.42106	0.043931	0.20186	0.14701
	15.0104	0.42749	0.30775	0.37392	0.036172	0.2174	0.089023
	15.0271	0.40638	0.31734	0.30393	0.035501	0.26452	0.068257
	15.0438	0.41457	0.34083	0.30786	0.016781	0.28155	0.089409
	15.0605	0.41111	0.37787	0.31364	0.0027668	0.23973	0.11266
	15.0771	0.36481	0.35949	0.32197	0.0033428	0.21012	0.13514
	15.0938	0.2884	0.29376	0.33063	0.025077	0.17302	0.12799
	15.1105	0.27288	0.22067	0.27869	0.061517	0.15591	0.10135
	15.1272	0.29773	0.19193	0.21771	0.061148	0.17505	0.087748
	15.1438	0.33638	0.19676	0.16057	0.037628	0.17468	0.089313
	15.1605	0.36056	0.23509	0.16211	0.019591	0.15806	0.075216
	15.1772	0.34855	0.29694	0.22325	0.014931	0.15733	0.072241
	15.1939	0.30579	0.3121	0.23948	0.017445	0.17819	0.09305
	15.2106	0.29923	0.34021	0.20564	0.021437	0.22379	0.11439
	15.2272	0.35849	0.37103	0.21527	0.012085	0.22089	0.12085
	15.2439	0.36003	0.30806	0.26442	0.012543	0.17757	0.12935
	15.2606	0.33176	0.18374	0.31293	0.030795	0.17804	0.13479
	15.2773	0.303	0.13135	0.33535	0.030782	0.16752	0.10751
	15.294	0.27824	0.16571	0.35176	0.031374	0.13104	0.088123
	15.3106	0.32523	0.19409	0.35121	0.04242	0.12339	0.064818
	15.3273	0.36696	0.21052	0.33034	0.034309	0.13554	0.056761
	15.344	0.38227	0.2653	0.33465	0.022222	0.13145	0.076895
	15.3607	0.39872	0.28402	0.32935	0.041683	0.15481	0.10469
	15.3773	0.37081	0.21622	0.36875	0.098199	0.18725	0.09442
	15.394	0.33749	0.16592	0.44903	0.13449	0.17961	0.064669
	15.4107	0.3533	0.21233	0.52101	0.11485	0.16981	0.073638
	15.4274	0.38524	0.30816	0.47216	0.10277	0.16235	0.090156
	15.4441	0.35808	0.35269	0.38054	0.096871	0.16247	0.061357
	15.4607	0.30823	0.37082	0.34314	0.076225	0.17323	0.037753
	15.4774	0.30623	0.37683	0.32933	0.085591	0.19439	0.06208
	15.4941	0.33018	0.37478	0.33218	0.11661	0.2046	0.084516
	15.5108	0.33408	0.36206	0.31272	0.14445	0.20078	0.096322
	15.5274	0.32476	0.34459	0.29495	0.13677	0.23243	0.13383
	15.5441	0.33645	0.32392	0.27081	0.087194	0.28484	0.15264
	15.5608	0.3216	0.29259	0.23047	0.06544	0.24025	0.13451
	15.5775	0.30518	0.25827	0.18052	0.085144	0.17385	0.11514
	15.5942	0.27694	0.23552	0.1523	0.082615	0.16375	0.093547
	15.6108	0.24325	0.24953	0.20252	0.049406	0.15337	0.083809
	15.6275	0.26094	0.28052	0.24372	0.038773	0.17734	0.089062
	15.6442	0.27382	0.31301	0.25844	0.059115	0.2242	0.070696
	15.6609	0.28165	0.34291	0.23705	0.058454	0.24119	0.036708
	15.6776	0.28793	0.33108	0.17717	0.052002	0.20813	0.047028
	15.6942	0.22237	0.28979	0.17305	0.052508	0.18171	0.091527
	15.7109	0.17899	0.25933	0.19308	0.041528	0.16398	0.1088
	15.7276	0.17502	0.25573	0.18056	0.03359	0.15071	0.095357
	15.7443	0.18091	0.24076	0.13684	0.043299	0.1503	0.078471
	15.7609	0.20497	0.22644	0.1204	0.047498	0.16144	0.066444
	15.7776	0.25045	0.22778	0.13222	0.042112	0.17642	0.05177
	15.7943	0.2774	0.23803	0.14833	0.030539	0.18815	0.045656
	15.811	0.29792	0.33273	0.16109	0.021248	0.20284	0.052715
	15.8277	0.33039	0.41693	0.19827	0.020605	0.17895	0.050269
	15.8443	0.3854	0.37804	0.24952	0.012666	0.16062	0.049335
	15.861	0.41144	0.3324	0.31799	0.013963	0.18868	0.08146
	15.8777	0.40253	0.38168	0.34825	0.021395	0.2082	0.10729
	15.8944	0.40109	0.3963	0.34888	0.019262	0.19784	0.13933
	15.911	0.40482	0.30854	0.34974	0.017936	0.16141	0.16945
	15.9277	0.30758	0.22523	0.31872	0.017123	0.17004	0.12327
	15.9444	0.24274	0.18114	0.29421	0.018162	0.21306	0.096948
	15.9611	0.24406	0.19261	0.28537	0.047825	0.22345	0.11096
	15.9778	0.25775	0.24808	0.2821	0.10912	0.22352	0.099664
	15.9944	0.26405	0.30012	0.25677	0.13728	0.24062	0.10304
	16.0111	0.28346	0.33724	0.18763	0.1154	0.26331	0.089084
	16.0278	0.30781	0.33663	0.15379	0.098395	0.26485	0.074718
	16.0445	0.35789	0.30059	0.16363	0.1027	0.22349	0.068644
	16.0612	0.4032	0.26334	0.17078	0.09452	0.19123	0.068295
	16.0778	0.41037	0.30557	0.2075	0.066806	0.20177	0.080201
	16.0945	0.36395	0.35698	0.21996	0.077901	0.20919	0.091485
	16.1112	0.31958	0.29997	0.18744	0.10153	0.2016	0.095004
	16.1279	0.37061	0.20797	0.16046	0.084823	0.20988	0.1121
	16.1445	0.41467	0.23249	0.15258	0.061694	0.20526	0.10587
	16.1612	0.39859	0.28964	0.16108	0.056509	0.15785	0.069894
	16.1779	0.38102	0.26658	0.16253	0.061507	0.15738	0.077227
	16.1946	0.36415	0.2243	0.12883	0.065283	0.17039	0.10542
	16.2113	0.34725	0.24492	0.1149	0.061846	0.15408	0.10275
	16.2279	0.32148	0.28816	0.13704	0.046784	0.11467	0.090082
	16.2446	0.31354	0.31546	0.17951	0.045502	0.12358	0.091345
	16.2613	0.3178	0.30446	0.22726	0.042392	0.16893	0.10233
	16.278	0.29426	0.29045	0.24225	0.046052	0.1999	0.084782
	16.2946	0.34142	0.30949	0.25075	0.07456	0.18522	0.051197
	16.3113	0.40347	0.36245	0.25672	0.066133	0.18552	0.056865
	16.328	0.41002	0.41099	0.20871	0.02447	0.19899	0.067451
	16.3447	0.38013	0.39274	0.19109	0.011789	0.18011	0.056151
	16.3614	0.33477	0.31686	0.22085	0.040995	0.16607	0.042926
	16.378	0.32578	0.29378	0.24116	0.095387	0.15735	0.047118
	16.3947	0.38946	0.34163	0.28488	0.12418	0.14593	0.063878
	16.4114	0.45899	0.38094	0.35029	0.132	0.19106	0.071257
	16.4281	0.48848	0.3966	0.3668	0.14476	0.21625	0.075428
	16.4448	0.49832	0.37273	0.3364	0.1372	0.20412	0.13546
	16.4614	0.45347	0.34819	0.32265	0.095504	0.19729	0.19838
	16.4781	0.40132	0.32001	0.32778	0.070873	0.2172	0.17379
	16.4948	0.38939	0.28335	0.3001	0.093667	0.25618	0.12303
	16.5115	0.38774	0.24421	0.31433	0.1135	0.24758	0.10146
	16.5281	0.45986	0.25494	0.41817	0.10155	0.22626	0.15238
	16.5448	0.54636	0.30669	0.48124	0.084191	0.25228	0.18889
	16.5615	0.58391	0.33313	0.48483	0.096299	0.30785	0.17914
	16.5782	0.56137	0.30638	0.51968	0.11814	0.33637	0.19628
	16.5949	0.48561	0.27488	0.53475	0.11401	0.40599	0.19718
	16.6115	0.43669	0.28446	0.50882	0.089765	0.4469	0.16588
	16.6282	0.44743	0.35981	0.51937	0.079808	0.39334	0.14709
	16.6449	0.44083	0.39338	0.51872	0.072074	0.34778	0.13738
	16.6616	0.37457	0.35563	0.50177	0.058463	0.30205	0.14017
	16.6782	0.40453	0.3241	0.52576	0.063164	0.28601	0.13842
	16.6949	0.48507	0.30182	0.51418	0.080522	0.30127	0.15048
	16.7116	0.47249	0.26932	0.42016	0.084093	0.34126	0.14529
	16.7283	0.43629	0.26233	0.35684	0.085908	0.35151	0.13744
	16.745	0.4379	0.295	0.35015	0.086066	0.31072	0.15991
	16.7616	0.42784	0.33019	0.32155	0.081613	0.30848	0.19543
	16.7783	0.38261	0.38161	0.25767	0.090526	0.35083	0.19372
	16.795	0.36284	0.37441	0.26128	0.070241	0.3726	0.19689
	16.8117	0.40069	0.34374	0.28642	0.060845	0.40712	0.22878
	16.8284	0.43788	0.3774	0.26903	0.097406	0.41208	0.23339
	16.845	0.42955	0.38271	0.28085	0.10481	0.37462	0.20582
	16.8617	0.39362	0.36666	0.3375	0.091864	0.33053	0.19266
	16.8784	0.36468	0.36304	0.35401	0.075231	0.2934	0.20543
	16.8951	0.34856	0.32638	0.34557	0.062008	0.27405	0.20053
	16.9117	0.39946	0.31139	0.32107	0.063289	0.26798	0.15978
	16.9284	0.4715	0.32098	0.31629	0.077951	0.23594	0.1275
	16.9451	0.51231	0.34764	0.32147	0.10753	0.18702	0.1063
	16.9618	0.54504	0.38778	0.29463	0.11304	0.19546	0.092131
	16.9785	0.50482	0.44925	0.31703	0.10445	0.16647	0.08723
	16.9951	0.40337	0.45913	0.36732	0.11233	0.1514	0.090024
	17.0118	0.35685	0.3516	0.3902	0.089172	0.20547	0.1071
	17.0285	0.40277	0.25925	0.39232	0.048789	0.23682	0.12099
	17.0452	0.44336	0.2222	0.37633	0.055004	0.26545	0.11879
	17.0618	0.42296	0.23323	0.3548	0.089423	0.2813	0.10152
	17.0785	0.41205	0.29094	0.30381	0.10442	0.28622	0.10904
	17.0952	0.38654	0.33079	0.23032	0.10975	0.29795	0.12147
	17.1119	0.36892	0.34374	0.21516	0.12297	0.29973	0.10332
	17.1286	0.39075	0.31074	0.24361	0.12571	0.30524	0.098385
	17.1452	0.41218	0.25781	0.29821	0.13445	0.3319	0.13477
	17.1619	0.40493	0.28549	0.36099	0.1553	0.32497	0.18211
	17.1786	0.46188	0.38215	0.37028	0.16261	0.29716	0.21865
	17.1953	0.57474	0.35961	0.31248	0.13846	0.29456	0.20502
	17.212	0.61845	0.25229	0.27248	0.10686	0.296	0.15693
	17.2286	0.56479	0.26047	0.28994	0.077613	0.2671	0.11238
	17.2453	0.50013	0.2886	0.30198	0.066788	0.21879	0.095019
	17.262	0.4715	0.23413	0.30434	0.068006	0.22394	0.083251
	17.2787	0.45224	0.21946	0.31429	0.084851	0.24943	0.080128
	17.2953	0.47366	0.24672	0.30479	0.10424	0.24549	0.10211
	17.312	0.50177	0.26007	0.31639	0.097814	0.25018	0.12607
	17.3287	0.49572	0.26882	0.3289	0.10483	0.2293	0.16365
	17.3454	0.53833	0.31128	0.33354	0.12265	0.22727	0.19679
	17.3621	0.53917	0.36804	0.33425	0.11911	0.31886	0.17637
	17.3787	0.50854	0.39319	0.33225	0.11887	0.40886	0.14502
	17.3954	0.4806	0.38703	0.30466	0.10933	0.40142	0.17477
	17.4121	0.46196	0.38056	0.26193	0.087873	0.36615	0.18049
	17.4288	0.45405	0.36976	0.24195	0.095525	0.3404	0.14614
	17.4454	0.45719	0.36503	0.25329	0.13759	0.37131	0.13893
	17.4621	0.44797	0.35366	0.29302	0.15813	0.39635	0.15916
	17.4788	0.42122	0.34681	0.37596	0.11895	0.3905	0.1641
	17.4955	0.42476	0.3162	0.43701	0.074604	0.37684	0.13787
	17.5122	0.50203	0.2995	0.44664	0.074627	0.40324	0.15093
	17.5288	0.51955	0.27859	0.42588	0.12323	0.42414	0.18747
	17.5455	0.47956	0.23806	0.433	0.17541	0.34287	0.16375
	17.5622	0.44908	0.2472	0.41114	0.17885	0.30099	0.11049
	17.5789	0.44274	0.30442	0.35107	0.12963	0.29175	0.10173
	17.5956	0.45373	0.32872	0.31237	0.069707	0.30462	0.14908
	17.6122	0.44216	0.32349	0.27583	0.056531	0.34246	0.20082
	17.6289	0.46853	0.3548	0.27483	0.069964	0.36799	0.18968
	17.6456	0.51019	0.42807	0.3066	0.081982	0.41566	0.1467
	17.6623	0.49733	0.51847	0.34963	0.11422	0.44009	0.13514
	17.6789	0.47727	0.55485	0.43953	0.16401	0.42781	0.16139
	17.6956	0.49211	0.49852	0.51488	0.22472	0.46393	0.22039
	17.7123	0.55078	0.48198	0.52043	0.27195	0.52453	0.26096
	17.729	0.57991	0.51391	0.51011	0.25362	0.52196	0.24003
	17.7457	0.53816	0.43262	0.47897	0.22415	0.45448	0.18334
	17.7623	0.55525	0.3646	0.46069	0.24397	0.43798	0.15071
	17.779	0.66746	0.4035	0.52661	0.2202	0.48453	0.1604
	17.7957	0.69471	0.45188	0.56812	0.18526	0.52596	0.17873
	17.8124	0.64158	0.48011	0.523	0.17722	0.56093	0.18474
	17.829	0.62153	0.49048	0.52796	0.18757	0.5774	0.22551
	17.8457	0.57921	0.51226	0.60359	0.21352	0.5365	0.27026
	17.8624	0.59531	0.54541	0.64742	0.23041	0.52957	0.26554
	17.8791	0.67066	0.53525	0.59432	0.23587	0.56554	0.25704
	17.8958	0.65221	0.51351	0.55336	0.23439	0.59018	0.27514
	17.9124	0.60427	0.52523	0.61484	0.23288	0.59946	0.30309
	17.9291	0.50722	0.55908	0.70643	0.25156	0.53166	0.29835
	17.9458	0.47407	0.54983	0.6455	0.23139	0.39785	0.24218
	17.9625	0.54774	0.51287	0.50286	0.22702	0.35362	0.20567
	17.9792	0.60703	0.57904	0.51098	0.3253	0.48007	0.25367
	17.9958	0.69124	0.66191	0.63616	0.39159	0.61523	0.36448
	18.0125	0.82954	0.69467	0.7781	0.4277	0.65779	0.42527
	18.0292	0.93174	0.7077	0.9033	0.42974	0.69272	0.41753
	18.0459	0.98866	0.67744	1.0294	0.39553	0.76125	0.44577
	18.0625	0.93929	0.69628	1.054	0.42218	0.80083	0.50367
	18.0792	0.81087	0.72984	0.95724	0.49908	0.78898	0.54839
	18.0959	0.72364	0.70569	0.93947	0.51702	0.72598	0.56018
	18.1126	0.72495	0.73988	0.96144	0.46637	0.74284	0.54021
	18.1293	0.76895	0.8133	0.92689	0.43611	0.75074	0.47095
	18.1459	0.8055	0.80517	0.84333	0.41246	0.68762	0.38595
	18.1626	0.8091	0.78955	0.81102	0.35936	0.65254	0.38522
	18.1793	0.83074	0.80026	0.86173	0.33092	0.64382	0.40173
	18.196	0.84944	0.77391	0.86491	0.32835	0.61957	0.33845
	18.2126	0.78623	0.71789	0.8556	0.30069	0.62005	0.27711
	18.2293	0.78045	0.73561	0.8492	0.28618	0.66419	0.31665
	18.246	0.80901	0.7914	0.80128	0.26194	0.69945	0.38693
	18.2627	0.77587	0.79666	0.83507	0.25275	0.68656	0.37984
	18.2794	0.71283	0.72863	0.88722	0.31741	0.62837	0.33438
	18.296	0.69685	0.635	0.91231	0.3366	0.63543	0.32243
	18.3127	0.79103	0.63051	0.91601	0.28977	0.72258	0.35041
	18.3294	0.87548	0.67687	0.84776	0.28871	0.73593	0.36553
	18.3461	0.85051	0.73583	0.82087	0.35192	0.65473	0.34096
	18.3628	0.79682	0.7969	0.80869	0.37824	0.58667	0.27098
	18.3794	0.78697	0.80099	0.83189	0.3578	0.60053	0.21577
	18.3961	0.74878	0.72226	0.82375	0.30331	0.6245	0.21282
	18.4128	0.70541	0.65452	0.77857	0.25306	0.61324	0.24479
	18.4295	0.72898	0.66838	0.79232	0.26243	0.63825	0.27945
	18.4461	0.73467	0.73639	0.80706	0.28549	0.66249	0.29624
	18.4628	0.69233	0.73632	0.78956	0.2773	0.64288	0.31492
	18.4795	0.68299	0.68458	0.78883	0.28121	0.69177	0.36461
	18.4962	0.80934	0.65578	0.79734	0.29437	0.69994	0.35408
	18.5129	0.94309	0.68792	0.77352	0.34249	0.68287	0.33743
	18.5295	0.96219	0.75915	0.76131	0.42805	0.71681	0.4025
	18.5462	0.97442	0.81123	0.81211	0.48242	0.76158	0.49356
	18.5629	1.0382	0.9111	0.94596	0.53808	0.7841	0.54058
	18.5796	1.1495	0.97914	1.0299	0.60194	0.78478	0.55383
	18.5962	1.1526	0.96933	1.048	0.64158	0.7668	0.53175
	18.6129	1.0083	0.87533	1.0158	0.63941	0.76761	0.44405
	18.6296	0.88993	0.77362	0.94821	0.61578	0.80453	0.43776
	18.6463	0.88021	0.76797	0.93033	0.57996	0.76948	0.4558
	18.663	0.89422	0.78658	0.94329	0.51067	0.72791	0.41926
	18.6796	0.90761	0.7907	0.94619	0.46249	0.77932	0.42511
	18.6963	0.94724	0.75907	0.96974	0.44279	0.81182	0.43339
	18.713	0.98464	0.77009	0.98881	0.46566	0.75734	0.39025
	18.7297	0.99806	0.80458	0.99438	0.45005	0.75605	0.37449
	18.7464	0.94111	0.78556	0.91461	0.40329	0.72206	0.3966
	18.763	0.90406	0.70564	0.81137	0.38992	0.66677	0.38716
	18.7797	0.90709	0.66955	0.72237	0.41343	0.67639	0.35166
	18.7964	0.83163	0.67999	0.67204	0.40093	0.64058	0.2729
	18.8131	0.75386	0.67343	0.72563	0.37241	0.58755	0.21853
	18.8297	0.77902	0.67436	0.81046	0.40329	0.58842	0.21928
	18.8464	0.84373	0.6445	0.74663	0.39848	0.62705	0.249
	18.8631	0.87131	0.61308	0.70932	0.39957	0.60686	0.28235
	18.8798	0.84045	0.6007	0.82191	0.40422	0.5723	0.3001
	18.8965	0.83268	0.63659	0.8447	0.41564	0.57298	0.30137
	18.9131	0.92211	0.65679	0.77157	0.42082	0.59004	0.27155
	18.9298	1.0007	0.6747	0.80129	0.41433	0.56396	0.25425
	18.9465	1.0699	0.74261	0.83474	0.34476	0.58675	0.28122
	18.9632	1.0299	0.7972	0.8151	0.2941	0.65017	0.26142
	18.9798	0.90521	0.7919	0.80647	0.29495	0.69009	0.22238
	18.9965	0.82992	0.75933	0.76512	0.31773	0.67846	0.2252
	19.0132	0.80891	0.73282	0.69405	0.36834	0.66999	0.23946
	19.0299	0.7943	0.68064	0.68452	0.37011	0.68867	0.22917
	19.0466	0.75602	0.68535	0.70451	0.31475	0.68235	0.20848
	19.0632	0.75455	0.7089	0.72021	0.27803	0.66799	0.17937
	19.0799	0.81532	0.67849	0.67879	0.30527	0.6868	0.19349
	19.0966	0.86291	0.64643	0.64062	0.3604	0.68737	0.24828
	19.1133	0.84197	0.67076	0.66287	0.36423	0.66631	0.25776
	19.13	0.80475	0.73467	0.67243	0.33381	0.64767	0.21423
	19.1466	0.85354	0.77941	0.65784	0.2975	0.64774	0.19093
	19.1633	0.91345	0.7552	0.68936	0.30948	0.62492	0.20777
	19.18	0.89756	0.76205	0.68555	0.31835	0.59894	0.23533
	19.1967	0.82319	0.72436	0.67307	0.30113	0.63233	0.24222
	19.2133	0.78893	0.64905	0.64892	0.28052	0.64871	0.25188
	19.23	0.8161	0.61366	0.63687	0.23352	0.60605	0.25062
	19.2467	0.87676	0.64219	0.62447	0.19889	0.58557	0.21127
	19.2634	0.90355	0.6831	0.60854	0.18626	0.52646	0.16791
	19.2801	0.83467	0.66918	0.5825	0.20258	0.46373	0.15526
	19.2967	0.74265	0.6582	0.57721	0.256	0.45645	0.14469
	19.3134	0.70043	0.6912	0.62702	0.28753	0.47825	0.14888
	19.3301	0.72292	0.70217	0.65622	0.26345	0.5048	0.17295
	19.3468	0.81055	0.71147	0.6599	0.23039	0.49294	0.18971
	19.3634	0.87261	0.713	0.66003	0.23924	0.44499	0.19162
	19.3801	0.84046	0.72103	0.62482	0.24168	0.46265	0.17396
	19.3968	0.78429	0.74372	0.59833	0.20562	0.53912	0.12853
	19.4135	0.80996	0.75092	0.60179	0.14434	0.57983	0.1372
	19.4302	0.86276	0.76974	0.61148	0.10154	0.52323	0.19967
	19.4468	0.87585	0.78882	0.60691	0.10478	0.44169	0.21349
	19.4635	0.85303	0.72516	0.58715	0.14561	0.43163	0.18204
	19.4802	0.78727	0.65161	0.58591	0.15449	0.44119	0.16077
	19.4969	0.75838	0.61714	0.59811	0.13952	0.43062	0.14456
	19.5136	0.79028	0.60069	0.58532	0.15795	0.47163	0.12965
	19.5302	0.81085	0.61934	0.55636	0.15529	0.49459	0.13301
	19.5469	0.8328	0.64033	0.4997	0.14707	0.42894	0.15886
	19.5636	0.85025	0.64662	0.47031	0.12777	0.37999	0.1702
	19.5803	0.78514	0.70921	0.52456	0.12188	0.35883	0.15887
	19.5969	0.7416	0.76722	0.588	0.14309	0.37305	0.15436
	19.6136	0.76038	0.6929	0.58831	0.16268	0.40865	0.13893
	19.6303	0.74761	0.56096	0.47103	0.16542	0.44723	0.10385
	19.647	0.73319	0.53405	0.37624	0.16282	0.43462	0.074463
	19.6637	0.76981	0.5576	0.37187	0.15464	0.39292	0.074681
	19.6803	0.79525	0.5766	0.4114	0.15245	0.41087	0.0862
	19.697	0.78239	0.56122	0.46801	0.14772	0.4169	0.098268
	19.7137	0.78118	0.53355	0.49668	0.12049	0.38922	0.10745
	19.7304	0.77808	0.59971	0.50121	0.10461	0.39289	0.090392
	19.747	0.70093	0.66498	0.42442	0.11244	0.48228	0.089251
	19.7637	0.61888	0.63266	0.3149	0.11464	0.5255	0.10728
	19.7804	0.67999	0.57876	0.33865	0.11446	0.44969	0.11762
	19.7971	0.72031	0.53786	0.38628	0.10553	0.44025	0.12468
	19.8138	0.66542	0.46787	0.35269	0.095738	0.50627	0.13311
	19.8304	0.5874	0.44313	0.3057	0.11215	0.52399	0.13604
	19.8471	0.49586	0.49277	0.33074	0.13153	0.5202	0.10242
	19.8638	0.5056	0.50403	0.37203	0.14189	0.48464	0.056685
	19.8805	0.57565	0.44403	0.33262	0.14529	0.42817	0.035129
	19.8972	0.56223	0.4165	0.26399	0.15012	0.36662	0.040881
	19.9138	0.54113	0.43141	0.22506	0.1702	0.31792	0.051437
	19.9305	0.54647	0.38819	0.27244	0.16065	0.37919	0.051908
	19.9472	0.52832	0.33249	0.35052	0.14835	0.47533	0.042776
	19.9639	0.5191	0.35906	0.35484	0.19211	0.48575	0.041048
	19.9805	0.51142	0.37624	0.29629	0.22255	0.47452	0.060571
	19.9972	0.48805	0.38017	0.29329	0.16172	0.47341	0.06537
	20.0139	0.46341	0.40428	0.30709	0.11745	0.47583	0.066745
	20.0306	0.43705	0.3798	0.25619	0.14072	0.4363	0.085634
	20.0473	0.51307	0.34942	0.21708	0.15591	0.4275	0.11323
	20.0639	0.62243	0.37053	0.20681	0.14303	0.47944	0.11631
	20.0806	0.63394	0.44565	0.20507	0.14213	0.4813	0.097149
	20.0973	0.59199	0.4938	0.19809	0.13965	0.44897	0.10565
	20.114	0.59426	0.49428	0.18621	0.13306	0.42714	0.10609
	20.1306	0.60004	0.45755	0.19064	0.12276	0.40866	0.095479
	20.1473	0.53977	0.42508	0.13843	0.11995	0.37521	0.10224
	20.164	0.46805	0.34409	0.099125	0.15154	0.3706	0.09882
	20.1807	0.48101	0.24221	0.13316	0.14919	0.36321	0.085859
	20.1974	0.49314	0.22733	0.18056	0.12453	0.3418	0.080722
	20.214	0.4675	0.24439	0.1977	0.13829	0.34013	0.085236
	20.2307	0.45351	0.32915	0.17276	0.13995	0.37414	0.068177
	20.2474	0.44777	0.44769	0.1608	0.11289	0.37593	0.036857
	20.2641	0.43435	0.51915	0.18141	0.12363	0.35577	0.032599
	20.2808	0.45261	0.50105	0.21211	0.13407	0.35911	0.04045
	20.2974	0.42819	0.39558	0.2229	0.10448	0.40487	0.047693
	20.3141	0.36749	0.33585	0.16811	0.088095	0.43642	0.057983
	20.3308	0.32605	0.31554	0.12015	0.067827	0.41993	0.061811
	20.3475	0.32197	0.34449	0.12812	0.041032	0.40837	0.070966
	20.3641	0.3298	0.40634	0.16512	0.045735	0.39056	0.068606
	20.3808	0.32204	0.38635	0.20736	0.085617	0.36838	0.044742
	20.3975	0.35383	0.33068	0.24304	0.08462	0.37336	0.047965
	20.4142	0.37321	0.34501	0.27318	0.061355	0.35235	0.062548
	20.4309	0.34952	0.38251	0.2721	0.068851	0.31887	0.053869
	20.4475	0.3582	0.38827	0.24516	0.089059	0.30655	0.036778
	20.4642	0.36402	0.36033	0.26069	0.10911	0.28593	0.035461
	20.4809	0.33224	0.34874	0.26227	0.11488	0.26953	0.040002
	20.4976	0.31519	0.34154	0.22188	0.12166	0.26654	0.047362
	20.5142	0.32715	0.31811	0.20066	0.11728	0.29591	0.048111
	20.5309	0.33599	0.33127	0.18007	0.070491	0.32894	0.026767
	20.5476	0.34803	0.36618	0.17126	0.047315	0.34895	0.020139
	20.5643	0.36313	0.36061	0.20117	0.066089	0.34994	0.026601
	20.581	0.37347	0.33346	0.21972	0.074316	0.344	0.041591
	20.5976	0.3715	0.34881	0.21484	0.072544	0.33048	0.073292
	20.6143	0.3309	0.3419	0.19712	0.07136	0.30118	0.086322
	20.631	0.29634	0.28642	0.12983	0.06025	0.2754	0.065722
	20.6477	0.30008	0.24557	0.072012	0.059298	0.26481	0.054657
	20.6644	0.28336	0.23214	0.075018	0.060899	0.23161	0.088734
	20.681	0.29982	0.25308	0.10823	0.056438	0.20268	0.11548
	20.6977	0.29734	0.2772	0.13338	0.048602	0.20455	0.078758
	20.7144	0.24749	0.27605	0.14046	0.042786	0.23147	0.052813
	20.7311	0.22291	0.26116	0.13076	0.04634	0.23765	0.062111
	20.7477	0.21441	0.27025	0.10361	0.049089	0.22358	0.063245
	20.7644	0.19833	0.25462	0.083467	0.057992	0.24357	0.069891
	20.7811	0.19889	0.2246	0.10409	0.05014	0.28419	0.095154
	20.7978	0.17608	0.20536	0.12643	0.039692	0.27709	0.095565
	20.8145	0.16503	0.21017	0.10616	0.032267	0.2525	0.075086
	20.8311	0.15938	0.19372	0.08024	0.037632	0.27816	0.063386
	20.8478	0.18849	0.16513	0.076459	0.060424	0.30802	0.051394
	20.8645	0.2461	0.16801	0.088359	0.063964	0.32394	0.04833
	20.8812	0.2505	0.2161	0.10529	0.039359	0.31308	0.056529
	20.8978	0.23388	0.28953	0.13865	0.037402	0.31338	0.078687
	20.9145	0.26047	0.30935	0.17134	0.045434	0.32579	0.065614
	20.9312	0.26973	0.3254	0.17567	0.057241	0.3326	0.059342
	20.9479	0.24081	0.30084	0.17328	0.062939	0.34374	0.069919
	20.9646	0.21536	0.2756	0.16014	0.070835	0.31904	0.056624
	20.9812	0.20446	0.26921	0.13752	0.08635	0.2606	0.046186
	20.9979	0.22309	0.23859	0.11905	0.10368	0.25048	0.053005
	21.0146	0.22401	0.24912	0.11528	0.12971	0.26833	0.059818
	21.0313	0.22114	0.24212	0.11989	0.1544	0.2621	0.054437
	21.0479	0.22411	0.20796	0.15316	0.14635	0.26517	0.051164
	21.0646	0.19639	0.1949	0.16395	0.11865	0.29011	0.047024
	21.0813	0.18404	0.17475	0.13878	0.096829	0.29415	0.041435
	21.098	0.16978	0.15998	0.10213	0.085094	0.32023	0.057787
	21.1147	0.16424	0.19954	0.083251	0.080995	0.34858	0.08522
	21.1313	0.19723	0.25386	0.085687	0.060139	0.37661	0.07764
	21.148	0.2551	0.28139	0.063836	0.043055	0.39665	0.042491
	21.1647	0.28583	0.26231	0.029081	0.071565	0.3759	0.030169
	21.1814	0.2641	0.20724	0.012995	0.10766	0.35731	0.039971
	21.1981	0.21349	0.16007	0.03352	0.10582	0.33372	0.037148
	21.2147	0.19883	0.15576	0.064897	0.084465	0.29203	0.023531
	21.2314	0.23563	0.18892	0.056798	0.06897	0.22654	0.03647
	21.2481	0.254	0.20891	0.0404	0.073177	0.20934	0.04937
	21.2648	0.23153	0.1933	0.040748	0.062544	0.21427	0.044908
	21.2814	0.2138	0.18844	0.034874	0.034805	0.17242	0.063308
	21.2981	0.22159	0.18153	0.037699	0.017728	0.12275	0.084421
	21.3148	0.21876	0.16805	0.0495	0.019466	0.12278	0.075823
	21.3315	0.2091	0.16181	0.053943	0.016102	0.15782	0.049901
	21.3482	0.18646	0.14219	0.042971	0.01156	0.18298	0.039517
	21.3648	0.20924	0.14449	0.031168	0.017079	0.17752	0.041732
	21.3815	0.18818	0.15073	0.026388	0.024886	0.14847	0.046421
	21.3982	0.12516	0.16199	0.028453	0.025848	0.1319	0.065832
	21.4149	0.089073	0.17414	0.02758	0.037806	0.1731	0.07991
	21.4315	0.083513	0.17505	0.020106	0.06695	0.19775	0.087935
	21.4482	0.10231	0.17801	0.0068193	0.056281	0.1846	0.081116
	21.4649	0.13763	0.15059	0.012367	0.030816	0.16945	0.050568
	21.4816	0.15719	0.11106	0.030711	0.029211	0.15196	0.033111
	21.4983	0.14139	0.092916	0.028423	0.03221	0.1287	0.032243
	21.5149	0.11169	0.096327	0.023084	0.0282	0.12808	0.03759
	21.5316	0.10931	0.12423	0.022273	0.028181	0.16456	0.044851
	21.5483	0.10166	0.15549	0.017984	0.046156	0.19219	0.054095
	21.565	0.10826	0.17581	0.04176	0.086075	0.23927	0.054895
	21.5817	0.15272	0.16544	0.07461	0.11648	0.26765	0.049788
	21.5983	0.15146	0.1195	0.098062	0.10286	0.27867	0.044995
	21.615	0.10528	0.091419	0.10061	0.070948	0.29105	0.040537
	21.6317	0.079136	0.075918	0.081357	0.074902	0.27864	0.020446
	21.6484	0.10526	0.060099	0.067219	0.1029	0.2532	0.0036643
	21.665	0.13761	0.045221	0.084481	0.11206	0.26275	0.0016355
	21.6817	0.14092	0.027815	0.094896	0.10245	0.28034	0.012313
	21.6984	0.16327	0.029673	0.097499	0.098774	0.25995	0.034634
	21.7151	0.19463	0.042584	0.091921	0.081152	0.23587	0.046269
	21.7318	0.19654	0.03827	0.071321	0.045585	0.2478	0.042652
	21.7484	0.18129	0.028955	0.042506	0.021594	0.27152	0.041713
	21.7651	0.15206	0.035935	0.018738	0.017271	0.26444	0.046397
	21.7818	0.11818	0.054196	0.017246	0.020567	0.23602	0.053252
	21.7985	0.09097	0.072331	0.027458	0.024791	0.17048	0.057438
	21.8151	0.076034	0.070687	0.022661	0.019442	0.11341	0.038902
	21.8318	0.076788	0.058831	0.0094782	0.026851	0.15029	0.020845
	21.8485	0.08679	0.065814	0.01834	0.031514	0.19727	0.016508
	21.8652	0.09291	0.09451	0.040324	0.020455	0.18844	0.018748
	21.8819	0.095961	0.13973	0.053426	0.02393	0.1665	0.016442
	21.8985	0.080531	0.14784	0.06466	0.029133	0.16487	0.02538
	21.9152	0.056689	0.11619	0.063038	0.059603	0.18074	0.057068
	21.9319	0.041416	0.075888	0.039474	0.10467	0.18631	0.062432
	21.9486	0.074395	0.041083	0.023803	0.094928	0.19217	0.053495
	21.9653	0.11762	0.023456	0.024831	0.045915	0.23238	0.064969
	21.9819	0.12427	0.04112	0.019538	0.025896	0.23977	0.086081
	21.9986	0.13762	0.068869	0.026987	0.040143	0.18422	0.10932
	22.0153	0.16571	0.085756	0.049057	0.06309	0.15181	0.12205
	22.032	0.14853	0.093502	0.03691	0.069062	0.1561	0.086159
	22.0486	0.10218	0.096674	0.015949	0.055215	0.15971	0.066497
	22.0653	0.10097	0.099345	0.022233	0.028993	0.16106	0.096676
	22.082	0.10448	0.096332	0.04875	0.016307	0.21094	0.10642
	22.0987	0.092291	0.12051	0.072406	0.022479	0.27464	0.078632
	22.1154	0.081633	0.15006	0.086967	0.038424	0.29705	0.06849
	22.132	0.083948	0.12084	0.08959	0.045009	0.27705	0.081469
	22.1487	0.093364	0.069726	0.06776	0.044212	0.2728	0.0914
	22.1654	0.11334	0.061976	0.050517	0.044562	0.28777	0.092936
	22.1821	0.12205	0.090211	0.039073	0.061994	0.2759	0.072597
	22.1987	0.14488	0.070872	0.054131	0.081942	0.27063	0.05768
	22.2154	0.16714	0.040701	0.070982	0.10116	0.29879	0.06659
	22.2321	0.15473	0.066069	0.063933	0.13864	0.28953	0.071068
	22.2488	0.11861	0.10503	0.063641	0.18662	0.26138	0.070479
	22.2655	0.10193	0.12911	0.077859	0.20632	0.26911	0.060952
	22.2821	0.10636	0.14062	0.11764	0.19681	0.28388	0.034162
	22.2988	0.13896	0.14471	0.16414	0.15363	0.25737	0.018047
	22.3155	0.14849	0.17211	0.20351	0.12142	0.2275	0.015631
	22.3322	0.1168	0.18901	0.21503	0.12556	0.21338	0.019885
	22.3489	0.088937	0.15645	0.21801	0.14008	0.20998	0.034104
	22.3655	0.071179	0.12965	0.2089	0.14742	0.23487	0.043097
	22.3822	0.06736	0.13891	0.17777	0.12498	0.25881	0.028326
	22.3989	0.058022	0.15279	0.15598	0.11792	0.2596	0.010298
	22.4156	0.04931	0.15036	0.12202	0.13149	0.28509	0.012729
	22.4322	0.05776	0.1534	0.09517	0.11843	0.28267	0.033321
	22.4489	0.063354	0.1561	0.090609	0.10786	0.23619	0.037344
	22.4656	0.10224	0.16267	0.07396	0.1128	0.23963	0.037063
	22.4823	0.13605	0.14779	0.053401	0.094576	0.27742	0.053478
	22.499	0.13829	0.10798	0.04534	0.077901	0.30879	0.074491
	22.5156	0.1173	0.091872	0.039764	0.087079	0.30966	0.069099
	22.5323	0.085049	0.097071	0.046936	0.09906	0.28756	0.074058
	22.549	0.094113	0.1185	0.064941	0.10038	0.26509	0.077352
	22.5657	0.089849	0.14376	0.067747	0.099977	0.22279	0.065951
	22.5823	0.062425	0.13935	0.071951	0.11391	0.18712	0.048953
	22.599	0.075736	0.10755	0.10814	0.11715	0.19216	0.031265
	22.6157	0.11158	0.083127	0.11621	0.10481	0.22182	0.0256
	22.6324	0.12984	0.085824	0.098857	0.10639	0.26831	0.028602
	22.6491	0.13186	0.11974	0.09957	0.10434	0.34344	0.034179
	22.6657	0.16088	0.16453	0.10565	0.089082	0.38904	0.0594
	22.6824	0.22262	0.23197	0.09025	0.072537	0.37472	0.094969
	22.6991	0.24995	0.2829	0.057401	0.06061	0.3039	0.11854
	22.7158	0.26287	0.31706	0.060954	0.048172	0.25264	0.13986
	22.7325	0.24581	0.35961	0.080201	0.056677	0.21296	0.20023
	22.7491	0.21144	0.3478	0.07383	0.066213	0.18963	0.19958
	22.7658	0.17695	0.3196	0.066639	0.071128	0.21575	0.14046
	22.7825	0.15386	0.31255	0.084042	0.090262	0.25804	0.10407
	22.7992	0.15431	0.28597	0.081654	0.10559	0.24011	0.079177
	22.8158	0.13915	0.22923	0.061048	0.10082	0.23291	0.050891
	22.8325	0.14171	0.19906	0.060687	0.099418	0.26623	0.055848
	22.8492	0.15493	0.19087	0.064702	0.097511	0.27026	0.062598
	22.8659	0.18303	0.17164	0.061805	0.10253	0.25444	0.07443
	22.8826	0.18252	0.18678	0.10675	0.11926	0.29584	0.099689
	22.8992	0.18454	0.25197	0.17458	0.12682	0.30254	0.10331
	22.9159	0.27947	0.25355	0.18789	0.12735	0.28076	0.10231
	22.9326	0.34215	0.19365	0.20267	0.12638	0.31068	0.098678
	22.9493	0.28785	0.15564	0.19347	0.10029	0.30147	0.085653
	22.9659	0.20235	0.17407	0.16113	0.085954	0.22708	0.068419
	22.9826	0.14147	0.17636	0.14078	0.093547	0.1942	0.041896
	22.9993	0.12788	0.16594	0.11465	0.081281	0.22879	0.034187
	23.016	0.1372	0.17683	0.098672	0.059041	0.23991	0.056517
	23.0327	0.14055	0.18978	0.10931	0.048459	0.21884	0.070055
	23.0493	0.15162	0.21252	0.12932	0.059665	0.22887	0.06219
	23.066	0.15879	0.22608	0.1247	0.064033	0.2469	0.044863
	23.0827	0.15945	0.21475	0.081762	0.072237	0.24271	0.038448
	23.0994	0.185	0.18975	0.056854	0.089734	0.22793	0.052141
	23.1161	0.24628	0.18557	0.072706	0.08802	0.24683	0.072146
	23.1327	0.25208	0.20865	0.083317	0.067347	0.24874	0.079804
	23.1494	0.18132	0.23196	0.06536	0.051487	0.2365	0.068852
	23.1661	0.14689	0.2267	0.06464	0.044026	0.23269	0.072865
	23.1828	0.15905	0.21382	0.093938	0.063741	0.22764	0.097818
	23.1994	0.15607	0.19317	0.10966	0.068037	0.23206	0.10081
	23.2161	0.14211	0.16913	0.10926	0.060632	0.24498	0.10803
	23.2328	0.16065	0.1477	0.10492	0.066991	0.22753	0.1208
	23.2495	0.17256	0.13214	0.10336	0.086547	0.19674	0.13233
	23.2662	0.16465	0.13553	0.096341	0.11299	0.18407	0.12084
	23.2828	0.18523	0.1257	0.064538	0.13113	0.19622	0.074732
	23.2995	0.23216	0.08096	0.045977	0.14008	0.21029	0.047564
	23.3162	0.28426	0.084838	0.061798	0.11225	0.21531	0.032438
	23.3329	0.26967	0.13144	0.093605	0.10781	0.22128	0.028172
	23.3495	0.22245	0.18139	0.13057	0.14614	0.23631	0.045349
	23.3662	0.19738	0.21646	0.11998	0.15972	0.25391	0.051778
	23.3829	0.17782	0.21597	0.074258	0.14167	0.2503	0.052097
	23.3996	0.17406	0.21284	0.066886	0.13544	0.25232	0.042306
	23.4163	0.20182	0.21243	0.087179	0.14035	0.25922	0.034965
	23.4329	0.25511	0.20466	0.10869	0.14113	0.28344	0.06011
	23.4496	0.29101	0.1977	0.12777	0.12488	0.32519	0.10017
	23.4663	0.25445	0.21049	0.14928	0.10964	0.33469	0.10823
	23.483	0.21005	0.21866	0.15529	0.12425	0.29949	0.096724
	23.4997	0.18284	0.21254	0.12414	0.10784	0.23651	0.11116
	23.5163	0.18869	0.20905	0.10428	0.090741	0.19032	0.11714
	23.533	0.18566	0.2508	0.11658	0.11649	0.22203	0.097102
	23.5497	0.18104	0.28883	0.16448	0.11241	0.28217	0.076623
	23.5664	0.21536	0.30147	0.16536	0.10885	0.30859	0.073883
	23.583	0.2158	0.27717	0.11709	0.12362	0.3021	0.057341
	23.5997	0.19248	0.26224	0.085035	0.11966	0.30471	0.043131
	23.6164	0.20674	0.27936	0.098773	0.12453	0.32413	0.063307
	23.6331	0.20892	0.2978	0.14124	0.12417	0.36997	0.11749
	23.6498	0.17838	0.31693	0.17122	0.094957	0.38318	0.15004
	23.6664	0.15062	0.33168	0.15091	0.087062	0.34593	0.11131
	23.6831	0.15621	0.29777	0.12231	0.11332	0.32199	0.067189
	23.6998	0.14734	0.26534	0.11278	0.13202	0.31262	0.060345
	23.7165	0.13868	0.29665	0.10776	0.11981	0.34075	0.072776
	23.7331	0.18661	0.35237	0.10224	0.10817	0.33978	0.067025
	23.7498	0.23288	0.32471	0.11115	0.1339	0.30193	0.055014
	23.7665	0.27024	0.25642	0.13341	0.13605	0.30005	0.072822
	23.7832	0.30277	0.22201	0.15371	0.091249	0.30904	0.11414
	23.7999	0.2853	0.24042	0.1537	0.068365	0.30305	0.12685
	23.8165	0.26182	0.25298	0.1353	0.079105	0.26162	0.10562
	23.8332	0.24952	0.21859	0.1139	0.089702	0.22165	0.097158
	23.8499	0.2189	0.21089	0.12589	0.10925	0.20912	0.083888
	23.8666	0.20054	0.22808	0.16401	0.093853	0.24863	0.086801
	23.8833	0.18479	0.25741	0.18508	0.055251	0.28751	0.098804
	23.8999	0.17491	0.31974	0.17814	0.050229	0.28061	0.084658
	23.9166	0.16556	0.30569	0.16822	0.06416	0.29747	0.070439
	23.9333	0.17211	0.22452	0.13537	0.072054	0.3145	0.066883
	23.95	0.21235	0.19134	0.097961	0.082742	0.3165	0.065064
	23.9666	0.2849	0.1991	0.094859	0.08227	0.30606	0.076779
	23.9833	0.29461	0.21068	0.08686	0.065597	0.29646	0.096308
	24	0.20852	0.22822	0.0747	0.081005	0.30101	0.10895

## Sheet: Fig 3c
Figure 3c	No α-syn	α-Syn	α-Syn, mino RNAi	α-Syn, mino overexpression
	0.27598	0.44056	0.35536	0.5092
	0.32144	0.51714	0.26035	0.52752
	0.37024	0.34768	0.33392	0.49365
	0.38504	0.31201	0.24249	0.54102
	0.47701	0.34227	0.39074	0.722
	0.28157	0.41406	0.2721	0.48083
	0.37259	0.44499	0.22571	0.65573
	0.43467	0.3705	0.35788	0.63641
	0.28171	0.41751	0.23655	0.5846
	0.40478	0.30471	0.33008	0.60634
	0.36942	0.47221	0.24312	0.626
	0.53444	0.34638	0.21261	0.62993
	0.26704	0.32298	0.24867	0.44635
	0.40459	0.47406	0.34062	0.77012
	0.42505	0.4239	0.31902	0.62808
	0.25523	0.28539	0.19705	0.70399
		0.42808	0.29903	0.39806
		0.41804	0.206	0.72962
				0.69157
				0.60784

[truncated: 23 more sheets: Fig 3d, Fig 3e, Fig 3g, Fig 4a, Fig 4c, Fig 4d, Fig 4f, Fig 5a, Fig 5b, Fig 5c, Fig 5e, Fig 5g, Fig 6a, Fig 6b, Fig 6c, Supp Fig 1a, Supp Fig 1b, Supp Fig 1c, Supp Fig 1d, Supp Fig 2a …]
